1 Nicolas Chevigny<sup>1</sup>, Cédric Nadiras<sup>1</sup>, Cécile Raynaud<sup>2</sup>, Monique Le Ret<sup>1</sup>, Marc  
2 Bichara<sup>2</sup>, Mathieu Erhardt<sup>1</sup>, André Dietrich<sup>1</sup> and José M. Gualberto<sup>1</sup>

3

4 <sup>1</sup>Institut de Biologie Moléculaire des Plantes, CNRS UPR2357, Université de Strasbourg,  
5 12 rue du General Zimmer, 67084 Strasbourg, France

6

7 <sup>2</sup>Institute of Plant Sciences Paris-Saclay (IPS2), CNRS, INRA, Université Paris-Sud,  
8 Université Evry, Université Paris-Saclay, 91405, Orsay, Paris, France

9 S1

10

11 <sup>3</sup>CNRS UMR7242, IREBS, Université de Strasbourg, Bld Sébastien Brandt BP 10413, 67412  
12 Illkirch, France

13

14 **\*Corresponding author:**

15 José M. Gualberto

16 Institut de Biologie Moléculaire des Plantes, CNRS, Université de Strasbourg  
17 12 rue du General Zimmer, 67084 Strasbourg, France

18 Tel (+33) 367155361

19 Fax (+33) 3 67 15 53 00

20 jose.gualberto@ibmp-cnrs.unistra.fr

21

22

23 **Title:**

24

25 **RADA is the main branch migration factor in plant mitochondrial**  
26 **recombination and its defect leads to mtDNA instability and cell**  
27 **cycle arrest**

28

29

30 Short title: RADA in mitochondrial genome stability

31

32

33

34 The author responsible for distribution of materials integral to the findings presented in this  
35 article in accordance with the policy described in the Instructions for Authors  
36 ([www.plantcell.org](http://www.plantcell.org)) is José M. Gualberto ([jose.gualberto@ibmp-cnrs.unistra.fr](mailto:jose.gualberto@ibmp-cnrs.unistra.fr)).

37

38

39 **SYNOPSIS**

40 Arabidopsis RADA is a main branch migration activity in plant mitochondria, whose  
41 deficiency leads to mtDNA instability by recombination, and suppression of plant growth by  
42 the activation of repressors of cell cycle progression.

43

44

45 **ABSTRACT**

46

47 The mitochondria of flowering plants have large and complex genomes whose structure and  
48 segregation are modulated by recombination activities. Among unresolved questions is what  
49 are the pathways responsible for the late steps of homologous recombination: while the loss  
50 of mitochondrial recombination is not viable, a deficiency in RECG1-dependent branch  
51 migration has little impact on plant development. Here we present an additional pathway  
52 required for the processing of organellar recombination intermediates, the one depending on  
53 *RADA*. *RADA* is similar in structure and activity to bacterial RadA/Sms, and in vitro it binds to  
54 ssDNA and accelerates strand-exchange reactions initiated by RecA. *RADA*-deficient plants  
55 are severely impacted in their development and fertility, correlating with increased mtDNA  
56 ectopic recombination and replication of recombination-generated subgenomes. The *radA*  
57 mutation is epistatic to *recG1*, indicating that *RADA* drives the main branch migration  
58 pathway of plant mitochondria. In contrast, the double mutation *radA recA3* is lethal,  
59 revealing the importance of an alternative RECA3-dependent pathway. Interestingly, the  
60 *radA* developmental phenotypes could not be correlated with obvious defects in  
61 mitochondrial gene expression. Rather, it seems that it is the activation of genes that repress  
62 cell cycle progression that is partially the cause of the stunted growth of *radA* mutants.

## 63 INTRODUCTION

64

65 The mitochondrial genomes (mtDNA) of vascular plants are large and complex,  
66 mostly consisting of non-coding sequences assembled in a heterogeneous population of  
67 linear, circular and branched double-stranded (dsDNA) or single-stranded (ssDNA) DNA  
68 molecules (Backert et al., 1997; Bendich, 1996; Manchekar et al., 2006). In most species this  
69 collection of subgenomic molecules can be mapped into a single circular chromosome, but  
70 multichromosome mitogenomes can also exist (Sloan, 2013). The complexity of the plant  
71 mtDNA comes from frequent homologous recombination (HR) events involving repeated  
72 sequences. Large repeated sequences (> 500 bp) are involved in frequent and reversible  
73 homologous recombination (HR), while intermediate-size repeats (IRs) (50-500 bp) or  
74 microhomologies (<50 bp) can promote infrequent ectopic or illegitimate recombination,  
75 respectively (Christensen, 2018; Gualberto and Newton, 2017; Maréchal and Brisson, 2010;  
76 Woloszynska and Trojanowski, 2009). Recombination involving IRs or microhomologies  
77 contributes to the heteroplasmic state of mtDNA by creating sub-stoichiometric alternative  
78 configurations (mitotypes) that co-exist with the main genome (Small et al., 1989). Sub-  
79 stoichiometric mtDNA variants can become the predominant genome by a yet unclear  
80 process of clonal expansion called sub-stoichiometric shifting that can occur in the time  
81 frame of a single plant generation (Janska et al., 1998; Small et al., 1989; Vitart et al., 1992).  
82 These variants may present altered gene expression, resulting from the displacement of  
83 regulatory sequences or from the disruption of gene sequences. Such events may lead to the  
84 creation and expression of chimeric ORFs that can be deleterious for mitochondrial function,  
85 like in the case of cytoplasmic male sterility (CMS) (Budar et al., 2003; Hanson and Bentolila,  
86 2004). HR is also the main DNA repair pathway of plant mitochondria, for the repair of double  
87 strand breaks (DSBs) and the copy-correction of mutations, thus contributing to the very slow  
88 evolution of plant mtDNA coding sequences (Christensen, 2013; Mower et al., 2007).

89 Many of the factors involved in plant organellar recombination pathways are derived  
90 from prokaryotic homologs inherited from the symbiotic ancestors of mitochondria and  
91 chloroplasts (Boesch et al., 2011; Gualberto and Newton, 2017). However, the organellar  
92 pathways can significantly depart from the ones of their bacterial counterparts, and involve  
93 additional factors with partially redundant functions. As a representative example, plant  
94 organellar recombination relies on the abundant RecA-like RECA2 recombinase (about 450  
95 copies/mitochondrion, Fuchs et al., 2019), which is targeted to both organelles and whose  
96 mutation is lethal at the seedling developmental stage (Miller-Messmer et al., 2012; Shedge  
97 et al., 2007), but also involves plastidial RECA1 and mitochondrial RECA3. Although it could  
98 not be detected in *Arabidopsis* cultured cells (Fuchs et al., 2019) RECA3 is critical for mtDNA  
99 maintenance, since its loss causes mtDNA instability that worsens over generations (Miller-

100 Messmer et al., 2012; Shedje et al., 2007). This possibly reflects specialized functions and  
101 expression of RECA3 in specific tissues such as gametophytes (Miller-Messmer et al., 2012).  
102 Defect in the factors involved in mitochondrial HR generally results in genomic  
103 rearrangements because of increased ectopic recombination, a consequence of enhanced  
104 activity of alternative error-prone repair pathways (Miller-Messmer et al., 2012; Wallet et al.,  
105 2015).

106 In bacteria, HR is initiated by the loading of RecA on ssDNA, forming a nucleofilament  
107 that then seeks for homologies in the genome by probing multiple heterologous sequences  
108 (Forget and Kowalczykowski, 2012; Rangunathan et al., 2012). When a homologous  
109 sequence is identified, RecA-mediated ATP hydrolysis stabilizes the invading DNA, forming  
110 the synaptic complex also known as displacement loop or D-loop. An important post-synaptic  
111 step is branch migration, which involves helicases that extend the homologous region on  
112 both sides of the D-loop, allowing the recruitment of the fourth DNA strand to form a Holliday  
113 Junction (Cooper and Lovett, 2016; West, 1997; Whitby et al., 1994). Three partially  
114 redundant pathways of branch migration have been described in bacteria, involving RuvAB,  
115 RecG and RadA, respectively (Beam et al., 2002; Cooper et al., 2015). RadA has long been  
116 known as a RecA-like factor influencing repair by recombination (Beam et al., 2002), but its  
117 biochemical activities were only recently characterized (Cooper and Lovett, 2016; Marie et  
118 al., 2017). It is an ATP-dependent ssDNA helicase composed of three functional domains: an  
119 N-terminal C4 zinc-finger, a RecA-like ATPase domain and a Lon protease-like domain  
120 (Cooper et al., 2015). In contrast to RecG and RuvAB, RadA interacts with RecA and can  
121 function in the context of the RecA nucleofilament. Bacterial *radA* or *recG* single mutants are  
122 only mildly affected, but the *radA recG* double mutant is severely impaired in its survival  
123 under genotoxic conditions (Cooper et al., 2015). In fact, highlighting the crucial role of  
124 branch migration in HR, the deficiency in multiple branch migration pathways is more  
125 deleterious to the cell than the absence of recombination, probably because of the  
126 accumulation of toxic unprocessed recombination intermediates, (Beam et al., 2002; Cooper  
127 et al., 2015).

128 Plant genomes do not encode any homolog of the RuvAB complex, but code for a  
129 RecG homolog (RECG1) involved in mitochondrial recombination (Wallet et al., 2015;  
130 Odahara et al., 2015). Despite the absence of a mitochondrial RuvAB pathway, Arabidopsis  
131 *recG1* mutants are only mildly affected. As organellar recombination is essential for plant  
132 development (Miller-Messmer et al., 2012), a more deleterious effect was expected for the  
133 loss of this branch migration activity, suggesting the existence of additional pathways for the  
134 maturation of recombination intermediates.

135 Here we describe a plant RadA homolog that could potentially be involved in the late  
136 steps of organellar HR pathways. We show that Arabidopsis RADA possesses similar

137 activities as bacterial RadA. However, contrarily to bacteria, plant *radA* mutants are severely  
138 affected in their development because of mtDNA instability. The mutation is epistatic to  
139 *recG1*, indicating that RADA has a more prominent role in plant mitochondrial recombination  
140 than it has in bacteria. Furthermore we found that mtDNA instability triggered by the  
141 deficiency of RADA activates genes involved in the suppression of cell cycle progression,  
142 partially explaining the growth defect of *radA* plants.

143

144

## 145 RESULTS

146

### 147 **All plant genomes encompass a gene coding for RADA, and RADA from Arabidopsis** 148 **is targeted to both mitochondria and chloroplasts**

149 In bacteria, the *recG* mutation is strongly synergetic with *radA* for the repair of DNA  
150 damages, and the double mutant *recG radA* is at least as affected in growth as the RecA-  
151 deficient *recA* mutant (Beam et al., 2002; Cooper et al., 2015). In Arabidopsis mitochondria,  
152 RECA-dependent recombination is essential (Miller-Messmer et al., 2012), but the loss of the  
153 organellar-targeted RECG1 has only mild effects on plant fitness (Wallet et al., 2015). This  
154 suggested that additional genes exist coding for redundant or overlapping functions, such as  
155 for RadA and RecG in bacteria. The Arabidopsis (*Arabidopsis thaliana*) genome was  
156 screened for orthologs of RadA and the At5g50340 gene was identified as coding for a  
157 protein remarkably similar to bacterial RadA (45 % similarity), which we named *RADA*.

158 Phylogenetic analysis showed that genes coding for RADA are present in all groups  
159 of the green lineage, including land plants, green and red algae, as well as in brown algae,  
160 diatoms and also in several organisms of the Stramenopile group that are not photosynthetic,  
161 such as the water mold *Phytophthora infestans* (Supplemental Figure 1). But no RADA  
162 ortholog was found in animals or in yeast. While it is probable that plants inherited *RADA*  
163 from the prokaryote ancestor of mitochondria or chloroplasts, the strong conservation of the  
164 sequences did not allow us to infer whether the ancestor was a proteobacterial or a  
165 cyanobacterial RadA. Sequence alignments (Supplemental Figure 2) showed that plant  
166 RADA proteins have all the important functional motifs that have been described in bacterial  
167 RadA (Cooper and Lovett, 2016; Marie et al., 2017). In addition, plant RADA sequences  
168 have non-conserved N-terminal extensions predicted to be organellar targeting peptides  
169 (<http://suba.plantenergy.uwa.edu.au>). This assumption was tested by expression of a fusion  
170 to GFP. The fusion protein was constitutively expressed in transgenic Arabidopsis plants and  
171 found targeted to both chloroplasts and mitochondria, as shown by co-localization with the  
172 auto-fluorescence of chlorophyll and the red fluorescence of MitoTracker® (Figure 1). Thus,

173 RADA is apparently a dually targeted organellar protein, like RECG1 and many other factors  
174 involved in maintenance of organellar genomes (Gualberto and Newton, 2017). A previous  
175 report described the rice RadA ortholog as targeted to the nucleus (Ishibashi et al., 2006).  
176 This was inferred from immunodetection with an antibody supposed to be specific for the  
177 recombinant protein. However, our results did not show any hint of a nuclear localization of  
178 RADA in Arabidopsis.

179

## 180 **Structural and functional conservation of plant RADA as compared to bacterial RadA**

181 Plant RADA has the same modular structure as bacterial RadA (Figure 2A). A three  
182 dimensional model of Arabidopsis RADA could be generated (Figure 2B), based on the  
183 known structure of *Streptococcus pneumoniae* RadA (Marie et al., 2017). The RadA  
184 structure comprises a N-terminal C4 zinc-finger, required for the interaction with RecA, and  
185 two main domains: a RecA-like ATPase domain and a Lon protease-like domain. The RecA-  
186 like ATPase domain comprises the Walker A and B motifs, and a RadA-specific KNRFQ  
187 sequence (Figures S2 and 2A). The Walker A and KNRFQ motifs are indispensable for the  
188 branch migration function of the protein, and are also involved in the DNA-binding and  
189 helicase activities of RadA (Cooper and Lovett, 2016; Marie et al., 2017). In bacteria, Walker  
190 A and KNRFQ mutants are dominant negative, interfering with the function of the wild-type  
191 protein. The structural similarity between RadA and RecA suggests functional similarities, but  
192 while RecA specialized in the recognition of homologous sequences and strand invasion,  
193 RadA rather evolved for driving branch migration. Finally, the C-terminal P-domain of RadA  
194 is similar to the Lon protease-like domain of RecA, but it is an inactive domain, since the  
195 residues involved in protease activity are not conserved, and no protease activity could be  
196 detected (Inoue et al., 2017). Rather, this domain is involved in the binding to dsDNA and it  
197 works as a scaffold for the protein architecture, promoting its oligomerization as hexameric  
198 rings (Inoue et al., 2017; Marie et al., 2017).

199 Since all domains of plant RADA match the bacterial ones, it is expected to have the  
200 same activities as the bacterial enzyme. We have therefore tested the ability of plant RADA  
201 to complement *Escherichia coli* RadA in the repair of genotoxic stress-induced DNA lesions.  
202 A *radA785(del)::kan* strain was used for complementation assays, and Arabidopsis RADA  
203 and bacterial RadA were expressed from the low-copy number plasmid pACYC. As  
204 described by others, we found that the *radA* strain was little affected by genotoxic treatments  
205 versus WT (Beam et al., 2002; Cooper et al., 2015). The conditions we found best to test  
206 complementation were in the presence ciprofloxacin, an inhibitor of gyrase that induces DNA  
207 DSBs. In a spot assay, the growth of *radA*-deficient cells was much reduced as compared to  
208 WT ones. Expression of Arabidopsis RADA could complement the ciprofloxacin-triggered  
209 growth defect as well as bacterial RadA cloned in the same expression vector (Figure 2C).

210 Therefore plant RADA can functionally substitute bacterial RadA in the repair of DNA  
211 damages induced by ciprofloxacin.

212

213 **RADA is an ssDNA-binding protein that stimulates branch migration in strand-**  
214 **exchange reactions**

215 To test plant RADA activities we expressed a recombinant protein in bacteria. The  
216 Arabidopsis cDNA sequence minus the first 45 codons coding for the putative organellar  
217 targeting sequence was cloned in expression vector pET28a, fused to an N-terminal His-tag.  
218 A mutant sequence was prepared to express a Walker A-deficient protein (K201A). The  
219 mutation of the equivalent position in *E. coli* RadA abolished DNA-dependent ATPase activity  
220 and generated a dominant negative *radA* allele (Cooper et al., 2015; Cooper and Lovett,  
221 2016). According to the structure of the protein bound to ADP the mutation should not affect  
222 ATP or ADP binding, even if the ATPase activity is lost (Supplemental Figure 3).

223 Both WT RADA and K201A could be expressed and purified as soluble proteins  
224 (Supplemental Figure 4A). By gel filtration the purified WT protein resolved as two peaks of  
225 high molecular weight (Supplemental Figure 4B), indicating different degrees of protein  
226 oligomerization. Dynamic light scattering analysis of the smaller size oligomer showed that it  
227 was mainly constituted by a monodispersed particle of about 340 kDa, consistent with a  
228 hexameric RADA complex (Supplemental Figure 4C). EMSA experiments showed that both  
229 peak fractions could bind to an ssDNA oligonucleotide probe and give rise to complexes of  
230 same apparent size, but fractions of peak 1 generated predominantly higher molecular  
231 weight complexes (Supplemental Figure 4B).

232 The purified proteins were tested in EMSA experiments with different DNA structures  
233 as substrates, including ssDNA, dsDNA, fork-like structures and double-strand molecules  
234 containing 5' or 3' ssDNA overhangs. Using the same probe concentrations and increasing  
235 concentrations of recombinant protein we found that RADA could bind with equivalent  
236 affinities to all structures containing ssDNA regions. Binding to dsDNA also occurred, but  
237 with much less affinity (Figure 3A). In competition experiments poly-T, poly-C and poly-G  
238 could compete binding as efficiently as the homologous probe, while poly-A was much less  
239 efficient as a competitor (Supplemental Figure 5). Thus, Arabidopsis RADA binds  
240 preferentially to ssDNA, with little sequence specificity, and apparently without the  
241 requirement for ATP or ADP. However, in our experiments we found that higher molecular  
242 weight complexes could be formed. These were labile during electrophoresis, and could not  
243 be well resolved in standard conditions used for lower molecular weight complexes. On 4.5 %  
244 polyacrylamide gels and at lower voltage we could resolve these complexes, and found that  
245 they were promoted by the presence of ATP or ADP (Figure 3B). Such higher molecular  
246 weight complexes could correspond to the polymerization of RADA on ssDNA, forming

247 nucleofilaments. We did not see significant differences in binding with the K201A mutant  
248 protein, which seemed to bind to ssDNA with equivalent affinity as the WT protein.

249 The branch migration activity of plant RADA was also tested, using an *in vitro* strand-  
250 exchange reaction promoted by bacterial RecA. RecA, in the presence of ATP and bacterial  
251 single-strand binding protein SSB, can initiate the invasion of dsDNA by homologous ssDNA  
252 and promote branch migration till the final heteroduplex product is completed. In the  
253 presence of plant RADA the branched intermediates were resolved faster, leading to an  
254 earlier appearance of the final nicked double-stranded circular product (Figure 3C). The  
255 faster resolution of recombination intermediates was reproducibly observed in six  
256 independent experiments (Figure 3D).

257 To test whether RADA-promoted branch migration requires the interaction of the  
258 protein with RecA, assays were arrested by freezing at a time point (7 min) when there was  
259 already accumulation of branched intermediates, but no visible final heteroduplex product  
260 (Figure 3E left panel). The reaction mix was deproteinated and the purified nucleic acids  
261 added to new reaction mixes, in the presence or absence of RADA. In the absence of both  
262 RecA and RADA the branched intermediates could not spontaneously evolve and remained  
263 stable (Figure 3E middle panel), but in the presence of RADA they were converted to the  
264 final product, showing that RADA alone can promote branch migration (Figure 3E right  
265 panel). However, RADA is not a recombinase redundant with RecA, because RADA alone in  
266 the absence of RecA is not able to initiate the strand-invasion reaction (Figure 3F). Finally, in  
267 the same experimental conditions the K201A mutant protein was unable to promote branch  
268 migration, and rather completely inhibited the reaction (Figure 3G). This could be because of  
269 competition with RecA for DNA binding and because of the incapacity of the mutant protein  
270 to migrate along the heteroduplexes, an activity dependent on ATP hydrolysis.

271

## 272 **Arabidopsis plants deficient in RADA are severely affected in their development**

273 We could retrieve several potential *radA* loss-of-function (KO) lines from available  
274 Arabidopsis T-DNA insertion collections, from which two (*radA-1* and *radA-2*) could be  
275 confirmed by genotyping and sequencing, with T-DNA insertions in exons 8 and 5  
276 respectively (Figure 4A). Both lines are in the Col-0 background. As compared to WT,  
277 homozygous plants from both mutant lines displayed severe phenotypes of retarded growth  
278 of both leaves and roots, and of distorted leaves showing chlorotic sectors (Figure 4B-D).  
279 The phenotype was fully penetrant, with all homozygous mutants displaying the phenotype.  
280 Transmission electron microscope (TEM) observation showed that *radA* mesophyll cells  
281 were almost indistinguishable from WT, with chloroplasts that were morphologically normal.  
282 On the other hand, mitochondria looked enlarged in size, and less electron dense as  
283 compared to those from WT leaves, suggesting that it is the mitochondrion that is



284 predominantly affected in *radA* (Supplemental Figure 6). The severe dwarf phenotype could  
285 be partially relieved by growing *radA* plants on a short day photoperiod (8h light/16h dark, as  
286 compared to the 16h light/8h dark standard long day growth conditions). In such conditions  
287 plants revealed extended juvenility, with dramatic elongation of lifespan and development of  
288 aerial rosettes. Similar phenotype of perennial growth under short days was described for  
289 Arabidopsis *msh1* mutants, deficient in the homolog of bacterial mismatch repair protein  
290 MutS, and apparently as result from a developmental reprogramming triggered by the  
291 chloroplast (Xu et al., 2012).

292 To fully confirm that these phenotypes were because of a deficiency in RADA, *radA-1*  
293 plants were complemented with the WT *RADA* gene expressed under its own promoter. In  
294 the T2 generation, homozygous *radA-1* plants that also contained WT *RADA* as a transgene  
295 were phenotypically normal (Figure 4B), confirming the complementation and the linkage of  
296 the growth defects to the *radA* allele.

297

### 298 **Fertility defects of *radA* plants**

299 Arabidopsis *radA* could produce flower stems, but with very small siliques that mainly  
300 contained aborted seeds. The few seeds that were produced were heterogeneous in shape  
301 and only few germinated (Figure 5A and 5B). To better understand the reduced fertility of  
302 *radA* plants we observed both male and female organs. Anthers of *radA* produced pollen that  
303 stained positive by Alexander staining, suggesting that it was viable. But microscope  
304 inspection of anthers showed that pollen production was reduced compared to WT, and that  
305 there was a significant proportion of pollen grains of aberrant size and shape (Figure 5C).  
306 Thus, one reason for the partial sterility was low production and low quality of pollen.  
307 Regarding female organs, the stigma of *radA* flowers displayed elongated and fully  
308 differentiated papillae, but with no attached pollen grains (Figure 5D). Papillae secrete a  
309 polysaccharide-rich extracellular matrix optimal for the germination of pollen. Therefore the  
310 absence of attached pollen could be because papillae cells were modified and unable to bind  
311 pollen. To test whether *radA* female gametes were viable, we backcrossed *radA* with WT  
312 pollen, and observed ovules before and after pollination. Flowers from both WT and *radA*  
313 were emasculated, and 24h later the mature unfertilized ovules were observed on dissected  
314 pistils. The *radA* ovules looked morphologically normal and alike WT ovules, with visible and  
315 correctly positioned nuclei of the central and egg cells (Figure 5E left panel). Three days after  
316 pollination virtually all WT ovules were fertilized and showed a developing embryo, at the 2  
317 up to 8 cells globular stage. But in *radA* pistils, only 1/6th of the ovules had developing  
318 embryos (Figure 5E right panel). The remaining unfertilized ovules either looked normal or  
319 were degenerated, with unidentifiable cell types. No elongation of the pollinated pistils was  
320 observed. This suggested that normal pollen could not fertilize the apparently normal *radA*

321 ovules, potentially because of a deficiency in pollen germination in the stigma of *radA* plants.  
322 The partial sterility of *radA* would therefore be due to both male and female defects.

323

### 324 ***radA* mutants are affected in the stability of the mitochondrial genome**

325 Several *Arabidopsis* mutants affected in recombination functions (ex: *msh1*, *osb1*,  
326 *recA2*, *recA3*, *recG1*) showed, in normal growth conditions, increased ectopic recombination  
327 of the mtDNA across IRs (Gualberto and Newton, 2017). Such events can lead to changes in  
328 the stoichiometry of the different regions of the genome, and the severity of the molecular  
329 phenotype of increased ectopic recombination normally correlates with the severity of the  
330 developmental phenotypes (Arrieta-Montiel et al., 2009; Zaegel et al., 2006). The *radA*  
331 mutants were thus also tested for such molecular phenotype. Plants from both *radA-1* and  
332 *radA-2* lines of the second homozygous generation were grown *in vitro*. Four of them were  
333 selected according to the severity of the visible growth defect phenotype and further  
334 analyzed individually (Figure 6A). On these plants the relative copy number of the different  
335 mtDNA regions was quantified by qPCR, using a set of primer pairs spaced about 5 kb apart  
336 across the genome, as described (Wallet et al., 2015). The recently corrected *Arabidopsis*  
337 Col-0 mtDNA sequence was taken as reference (Sloan et al., 2018). Dramatic changes in the  
338 stoichiometry of mtDNA sequences were observed in all plants (Figure 6B). These affected  
339 similar regions of the genome in the individual plants, but the amplitude of the changes was  
340 higher in the severely affected plants (*radA-1#1* and *radA-2#1*) than in the mildly affected  
341 ones (*radA-1#2* and *radA-2#2*). An increase in copy number of large genomic regions could  
342 be observed, that could be as high as 7 fold. Several of the observed events of stoichiometry  
343 variation corresponded to regions flanked by pairs of directly oriented repeats, including the  
344 pair of repeats A (556 bp), F (350 bp), L (249 bp), and EE (127 bp) (Figure 6B). This  
345 suggested that the process at play was the same as that described for repeat EE in the  
346 *RECG1* KO mutant, *i.e.* the looping out of a circular subgenome by recombination across  
347 directly oriented IRs, followed by an autonomous replication (Wallet et al., 2015). We tested  
348 by qPCR the accumulation of corresponding crossover products for repeats F, L and EE, as  
349 previously described (Miller-Messmer et al., 2012; Wallet et al., 2015). Analysis of  
350 recombination involving repeats A was not possible, because the size of the region to be  
351 amplified (larger than 600 bp) was not compatible with qPCR. As expected, in all plants a  
352 significant increase in crossover products *versus* WT levels was observed for all analyzed  
353 repeats (Figure 6C), with a significantly higher accumulation in the more affected plants than  
354 in the mildly affected ones. Recombination resulted in the asymmetrical accumulation of  
355 mainly one of the two crossover products, with the remarkable exception of recombination  
356 involving the pair of repeats L, which resulted in the accumulation of only one of the  
357 reciprocal crossover products in mildly affected plants, while both products accumulated in

358 the severely affected plants. As described before, asymmetric accumulation of only one of  
359 the reciprocal recombination products could be because of repair of DSBs by error-prone  
360 break-induced replication (BIR), triggered by a deficiency in HR functions required for  
361 accurate replication-coupled repair (Gualberto and Newton, 2017; Christensen, 2018). Big  
362 differences in the relative accumulation of recombination products were seen, depending on  
363 the pair of repeats analyzed. But these values are misleading, because they are compared to  
364 the basal levels that exist in WT plants. Thus, a 30 fold increase in recombination product L-  
365 1/2 might be equivalent to a 1000 fold increase in product EE-2/1, because the former is  
366 already quite abundant in WT Col-0 and easily detected by hybridization, while the latter is  
367 virtually absent (Wallet et al., 2015; Zaegel et al., 2006).

368 Because RADA is also targeted to chloroplasts, the chloroplast DNA (cpDNA) of *radA*  
369 plants was likewise scanned for changes in sequence stoichiometry. No changes were  
370 detected between mutant and WT, apart from a slight general increase in cpDNA copy  
371 number in several individual plants, but below two fold and therefore probably not significant  
372 (Supplemental Figure7). Thus, in contrast to the major effects observed on mtDNA  
373 maintenance, the loss of RADA apparently does not significantly affect the replication and  
374 segregation of the cpDNA in Arabidopsis.

375

### 376 **The *radA* mutation is synergistic with *recA3* but not with *recG1***

377 In bacteria the *radA* mutation is highly synergistic with *recG*. We therefore tested the  
378 epistatic relationship between Arabidopsis *RADA* and *RECG1*, in *recG1 radA* double  
379 mutants. To compare all mutant plants at the first homozygous generation, heterozygous  
380 *recG1-2* plants (KO for *RECG1*, Wallet et al. 2015) were crossed with *radA-1* heterozygous  
381 plants used as pollen donor. Double heterozygous (*RECG1+/-RADA+/-*) F1 plants were  
382 selected, and in the segregating F2 generation we obtained WT, *recG1-2*, *radA-1* and  
383 *recG1-2 radA-1* double homozygous mutants. In this cross, plants inherit the mtDNA of  
384 accession *Ws*, which is the genetic background of *recG1-2*. As described, the *recG1-2* single  
385 mutants were similar to WT (Wallet et al., 2015). The *radA-1* single mutants developed the  
386 same growth defect phenotypes observed in the Col-0 background. However, the  
387 *recG1-2 radA-1* double mutants were as severely affected in growth as *radA-1* plants, with  
388 no evidence of a negative epistasis between the two mutations (Figure 7A). Thus, contrarily  
389 to bacteria, in plants the *recG1* and *radA* mutations are not synergistic, and RADA  
390 contributes to a higher extent to mitochondrial genome maintenance than does RECG1.

391 It was previously shown that *recG1* is synergistic with mutants deficient for *RECA3*  
392 (Wallet et al., 2015), which encodes a RecA ortholog that is dispensable, contrarily to RECA2  
393 (Miller-Messmer et al., 2012). Therefore we also tested the epistatic relationship between  
394 *radA* and *recA3*. The *recA3-2* and *radA-1* mutants (both in Col-0 background) were crossed,

395 using heterozygous plants as female and pollen donor, but no double homozygous mutants  
396 could be retrieved from F2 plants growing on soil. Seeds from sesquimutant *RECA3*-/  
397 *RADA*+/- were germinated *in vitro* and seedlings were genotyped, revealing that double  
398 homozygous *recA3 radA1* mutants could germinate, but were unable to grow roots and to  
399 further expand their cotyledons (Figure 7B). This seedling lethal phenotype was similar to the  
400 one of *recA2* (Miller-Messmer et al., 2012). The synergistic effect of the *radA* and *recA3*  
401 mutations suggests that the two factors intervene in alternative pathways, and that  
402 compromising both of these leads to a defect equivalent to the loss of the main RECA2-  
403 dependent recombination pathway.

404 The double mutants were tested for their cumulative effects on mtDNA stability. In the  
405 genetic background of the Ws mtDNA the effect of the *recG1* KO mutation was mainly the  
406 accumulation of the episome resulting from the recombination across the pair of direct  
407 repeats EE (Wallet et al., 2015). We tested the accumulation of this episome in *recG1-2*, in  
408 *radA-1* and in the double mutant *recG1-2 radA-1* (Figure 7C). In the first homozygous mutant  
409 generation we found a mild effect of *recG1-2* on the accumulation of the EE episome, 3 fold  
410 more abundant than the flanking mtDNA regions. The *radA-1* mutation had an equivalent  
411 effect, with an increase of about 3.3 fold as compared to the copy number of the flanking  
412 regions. However, in *recG1-2 radA-1* there was a significant increase in EE episome  
413 accumulation, with roughly a 10 fold higher copy number than the flanking regions. Thus, at  
414 the molecular level the double mutation has an additive impact on the correct segregation of  
415 mtDNA sequences, although without significant effects on plant development.

416 Regarding *recA3 radA1*, molecular analysis of a pool of double mutant seedlings  
417 showed that mtDNA stability was greatly affected, with an overall reduction in copy number  
418 as compared to WT seedlings of the same size, some regions being more than 20 fold  
419 reduced or increased as compared to neighboring sequences. Thus, the seedling lethality  
420 can be explained by massive problems in the replication and segregation of the mtDNA.

421

## 422 **Effects of mtDNA instability on the mitochondrial transcriptome**

423 As discussed above, the instability of the mtDNA in *radA* plants correlated with the  
424 severity of the growth defect phenotypes. However, in no case we found a significant  
425 reduction in copy number of a gene-containing sequence that could easily correlate the  
426 phenotype with a defect in mtDNA gene expression. In order to understand the reason of the  
427 *radA* growth defects we quantified by RT-qPCR the relative abundance of most mtDNA-  
428 deriving protein gene transcripts and rRNAs. Surprisingly, we found no apparent defects in  
429 mtDNA gene expression. For most transcripts we rather observed an increased  
430 accumulation as compared to WT plants of the same size (Figure 8A), up to 8-fold in the  
431 case of the *rps4* transcript. Because reshuffling of the mtDNA sequences by recombination

432 can change the expression of non-coding ORFs and even lead to the expression of chimeric  
433 genes we also tested the expression of a few mtDNA ORFs whose transcription could be  
434 affected by recombination across IRs. These included orf195, a chimera containing the  
435 N-terminus of *rps3* as a result of recombination across repeats A (Figure 8B), orf315, which  
436 is part of a chimera with the N-terminus of *atp9* following recombination across repeats G, as  
437 well as orf262a and orf255, which might be transcriptionally activated by recombination  
438 involving repeats E, L or H. Indeed we found an 8-fold increase in the abundance of orf195  
439 and orf315 transcripts, whose expression is driven by the *rps3* and *atp9* promoters,  
440 respectively. Thus, one of the possible reasons for the *radA* growth defects could be the  
441 expression of toxic ORFs generated by recombination and that interfere with the synthesis of  
442 mitochondrial OXPHOS subunits or with the assembly of OXPHOS complexes.

443

#### 444 **Instability of the mtDNA in *radA* mutants affects cell cycle progression**

445 Scanning electron microscopy (SEM) showed that *radA* epidermal leaf cells were  
446 much enlarged as compared to cells of WT leaves (Figure 9A). The *radA* leaves also had  
447 significantly fewer stomata ( $384.\text{mm}^{-2}$  in *radA-1* versus  $779.\text{mm}^{-2}$  in WT,  $\chi^2$  test=8.5E-14).  
448 This suggested an inhibition of cell division. To test such a possibility, we measured nuclear  
449 DNA ploidy levels by flow cytometry, in the fully developed first true leaves of 20-day-old  
450 *radA* and WT plants (Figure 9B and C). We found that *radA* leaves displayed a higher  
451 proportion of 4C and 8C nuclei than WT leaves, and an important reduction in 16C nuclei,  
452 suggesting that endoreduplication is inhibited in *radA* mutants. In all samples an  
453 accumulation of intermediate peaks (ex. 8-16C) was observed in all *radA* samples, but not in  
454 WT, also suggesting a blockage of cell cycle progression in S phase, or an induction of  
455 programmed cell death. To further explore whether mtDNA instability in *radA* impacts cell  
456 cycle progression we quantified nuclear DNA replication, using the thymidine analog 5-  
457 ethynyl-2'-deoxyuridine (EdU) to label newly replicated DNA in root tips. In *radA*, the ratio of  
458 EdU-positive nuclei was significantly reduced (Figure 9D). Counting of mitotic events in root  
459 tips also showed much reduced numbers of cells undergoing mitosis in *radA* (Figure 9E).

460 It is known that cell cycle checkpoints adjust cellular proliferation to changing growth  
461 conditions, arresting it by inhibiting the main cell cycle controllers that include cyclin-  
462 dependent kinases (CDKs) (Nowack et al., 2012). In plants, *SMR* genes encode inhibitors of  
463 CDK-cyclin complexes that are transcriptionally induced in response to changing conditions,  
464 integrating environmental and metabolic signals with cell cycle control (Dubois et al., 2018;  
465 Hudik et al., 2014; Yi et al., 2014). Interestingly, chloroplastic defects have been shown to  
466 induce cell cycle arrest through the induction of *SMR5* and *SMR7* (Hudik et al., 2014). How  
467 these genes are activated remains to be fully elucidated, but the mechanism could involve  
468 the activation of the DNA damage response (DDR). This signaling cascade is controlled by

469 the ATM and ATR kinases (Abraham, 2001) that phosphorylate the SOG1 transcription  
470 factor, leading to the up-regulation of thousands of target genes, including *SMR5* and *SMR7*  
471 (Yoshiyama, 2016; Yoshiyama et al., 2013). We have therefore tested the expression of  
472 several cell cycle markers and of several genes that are transcriptionally activated as part of  
473 the DDR. These included 14 *SMR* genes, selected cell cycle-related genes and the NAC-  
474 type transcription factors ANAC044 and ANAC085 that inhibit cell cycle progression in  
475 response to DNA damage through their activation by SOG1, but also in response to heat  
476 stress through a SOG1-independent pathway (Takahashi et al., 2019). Among the 14 *SMR*  
477 genes tested, we found strong induction of *SMR5* in *radA* (Figure 9F, left panel). But  
478 transcription of *SMR7*, whose activation has been described as associated with that of *SMR5*  
479 in the case of chloroplastic defects (Hudik et al., 2014; Yi et al., 2014), remained unchanged.  
480 ANAC085 was also transcriptionally activated in *radA*, more than 30-fold as compared to WT  
481 (Figure 9F, right panel). In addition, we observed a low-level, possibly not biologically  
482 significant, induction of the DDR genes *BRCA1* and *RAD51*, and of the *CYCB1;1* gene  
483 encoding a cyclin associated with G2 arrest and DSB repair (Weimer et al., 2016).

484 *SMR5* is a cyclin-dependent kinase inhibitor that is induced by different conditions  
485 leading to oxidative stress (Peres et al., 2007). ROS-dependent transcriptional activation of  
486 *SMR5* and of *SMR7* was confirmed in several ROS-inducing conditions (Yi et al., 2014). We  
487 have therefore tested whether the induction of *SMR5* in *radA* mutants could be due to the  
488 accumulation of ROS. Whole rosettes of WT and *radA* plants of same size were stained with  
489 nitro blue tetrazolium (NBT), to reveal for O<sup>2-</sup>, and a much higher accumulation of ROS was  
490 indeed confirmed in *radA* plants (Figure 9F).

491 Thus, an apparent component of the *radA* phenotype is a retrograde response that  
492 activates cell cycle regulators to inhibit cell proliferation. This could be because of the release  
493 of ROS from mitochondria, as a consequence of mtDNA instability in the absence of  
494 essential HR functions. It is tempting to speculate that the release of ROS results from the  
495 accumulation of aberrant proteins that interfere with normal OXPHOS functions.

496

## 497 **DISCUSSION**

498

499           The role of RadA in bacterial HR has been described only very recently (Cooper and  
500 Lovett, 2016; Marie et al., 2017). RadA is a hexameric helicase loaded by RecA on either  
501 side of the D-loop, to allow hybridization of the invading ssDNA with the recipient DNA (Marie  
502 et al., 2017). Our results imply similar functions for plant RADA in organelles, but with a more  
503 essential role than that of the bacterial counterpart.

504           RadA is a RecA paralog, found in all bacteria, algae and land plants. The protein  
505 sequence of RadA is well conserved between the various organisms, in particular those of  
506 the Walker A, Walker B and KNRFG motifs, as well as the N-terminal zinc finger domain. The  
507 modeled structure of plant RADA is very similar to that of *S. pneumoniae* RadA, suggesting  
508 that both proteins have the same activities. We established this conservation of activity  
509 between plant and bacterial proteins by complementation results and by *in vitro* activity tests.  
510 Arabidopsis RADA complements the survival of the bacterial *radA* mutant under genotoxic  
511 conditions, as efficiently as the *E. coli* protein when brought in *trans*. Similarly, we show here  
512 that plant RADA preferentially binds ssDNA and accelerates the *in vitro* strand-exchange  
513 reaction initiated by RecA, as described for bacterial RadA (Cooper and Lovett, 2016). It was  
514 previously reported that the rice ortholog is able to promote D-loop formation (Ishibashi et al.,  
515 2006). In that report, a different assay system was used, based on the invasion of double-  
516 stranded supercoiled plasmid by a labeled oligonucleotide, and the efficiency seemed quite  
517 low. With the Arabidopsis recombinant protein and in our test system we could not reproduce  
518 such an activity. As reported for bacterial RadA, we found that Arabidopsis RADA is not able  
519 to initiate strand invasion, and can only promote branch-migration.

520           Nevertheless, differences between the activities of Arabidopsis RADA and bacterial  
521 RadA were observed. RADA could bind ssDNA-containing molecules without the need for  
522 ADP or ATP. But in the presence of ADP or ATP it formed higher molecular weight  
523 complexes with ssDNA, suggesting a higher degree of protein oligomerization. In contrast,  
524 the presence of ATP activates the translocation of bacterial RadA and causes the  
525 dissociation of the protein from DNA (Marie et al., 2017). Only the mutant of the ATPase  
526 domain remains associated with DNA in the presence of ATP, because it is unable to  
527 activate translocation (Marie et al., 2017). In contrast, both the WT Arabidopsis RADA and  
528 the Walker A K201A mutant could bind to ssDNA and form high molecular weight complexes  
529 in the presence of ATP or ADP. An explanation would be that under our test conditions the  
530 ATPase activity of RADA is not functional, preventing translocation on the DNA. That seems  
531 unlikely, given that the recombinant protein could accelerate *in vitro* strand exchange, and  
532 should thus have translocase activity. As a whole, the conditions of interaction of RadA (or  
533 RADA) with DNA remain controversial. Marie et al. (2017) observed the binding of RadA to

534 DNA in the absence of ATP, and translocation in the presence of ATP. Cooper and Lovett  
535 (2016) observed RadA binding to DNA only in the presence of ADP, while we observed  
536 binding of RADA to DNA regardless of the presence of ADP or ATP.

537 In bacteria, the mutation of a single branch migration factor is only slightly deleterious  
538 for cell growth and DNA repair, and that is particularly true for RadA (Beam et al., 2002;  
539 Cooper et al., 2015). In plants however, the single loss of RADA severely affects plant  
540 development and fertility. This result also contrasts with the lack of a notable developmental  
541 phenotype observed for the *Arabidopsis recG1* mutants (Wallet et al., 2015). It therefore  
542 seems that in plants RADA has a more important role than RECG1. Since the RuvAB  
543 migration pathway is absent in plants, it is possible that HR in plant organelles has evolved  
544 by favoring the RADA pathway. Surprisingly, the double mutant *radA recG1* is not more  
545 affected in its development than the *radA* single mutant, while in bacteria the mutation of the  
546 different branch migration pathways is particularly synergistic (Beam et al., 2002; Cooper et  
547 al., 2015). The bacterial *radA recG* double mutant is more severely affected than the *recA*  
548 single mutant, indicating that the accumulation of unprocessed branched intermediates is  
549 more detrimental to the cell than the lack of recombination. In agreement with this  
550 hypothesis, the triple mutant *recA radA recG* is less affected than the *radA recG* double  
551 mutant. In plants, the *recA2* mutant is lethal at the seedling stage, and a double mutant  
552 *recA2 recA3* could not be segregated, suggesting a more vital role of recombination in  
553 organelles than in bacteria (Miller-Messmer et al., 2012). It is therefore surprising that the  
554 mutation of all known branch migration pathways in plants is not more deleterious than the  
555 mutation of the recombinase.

556 It is possible that non-processing of recombination intermediates is not as detrimental  
557 in plant organelles as in bacteria. But it can also be hypothesized that a further alternative  
558 pathway for the processing of recombination intermediates exists in plant organelles. The  
559 synergy of the *radA* and *recA3* mutations recalls that observed in the double mutants of  
560 bacterial branch migration factors (Cooper et al., 2015). Thus, it might be that RECA3 is  
561 involved in the processing of the recombination intermediates created by the RECA2  
562 recombinase, thanks to its branch-migration activity that is intrinsic to RecA-like proteins  
563 (Cox, 2007). Furthermore, RECA3 is characterized by the absence of an acidic C-terminal  
564 sequence that is found in all other RecA-like proteins, including RECA1 and RECA2 (Miller-  
565 Messmer et al., 2012; Shedje et al., 2007). In bacteria, the C-terminus is a site for  
566 interaction with many other proteins that regulate RecA activity. Its deletion results in a  
567 conformational change in the RecA-DNA filament and enhances almost every one of the  
568 RecA functions (Cox, 2007). In eukaryotes, RAD51 paralogs can also be involved in the  
569 regulation of recombinase functions (Chun et al., 2013; Qing et al., 2011). As an example,  
570 XRCC3, which is part of the CX3 complex, is necessary for the stabilization of



571 heteroduplexes and controls the extent of gene conversion, thus fulfilling roles reminiscent of  
572 branch migration factors (Brenneman et al., 2002). In this respect, RECA3 might have  
573 evolved to display enhanced branch migration activity and to be partially redundant to RADA.  
574 Nonetheless, unlike RADA, RECA3 apparently retained strand invasion activity, and could  
575 partially complement the bacterial *recA* mutant in the repair of UV-induced lesions (Miller-  
576 Messmer et al., 2012). RECA3 is therefore also partially redundant with RECA2. Whereas  
577 RECA2 and RADA would have specialized in homologous sequence recognition and  
578 invasion and branch migration, respectively, RECA3 would be more versatile and have  
579 retained both functions.

580 It is also conceivable that RECA3 acts in an alternative recombination pathway  
581 independent of RECA2 and RADA. In the absence of RADA, processing of the intermediates  
582 produced by the RECA2 pathway would require activation of the alternative RECA3-  
583 dependent recombination pathway. The loss of both RADA and RECA3 would overload the  
584 system with unresolved recombination intermediates, which would be lethal for the plant.

585 We show here that the absence of RADA results in a significant increase in mtDNA  
586 ectopic recombination, which leads to drastic changes in the stoichiometry of the genome.  
587 These changes are mostly due to the formation of sub-genomes that replicate more rapidly  
588 and without coordination with the rest of the mtDNA, as it was observed in the *recG1* mutant  
589 for the episome resulting from recombination involving repeats EE (Wallet et al., 2015). The  
590 more the stoichiometry of the mtDNA is modified, the more the development of the plant is  
591 affected. However, no region of the mtDNA containing functional genes is lost, and all  
592 mitochondrial genes that were tested are expressed. The expression of tRNAs has not been  
593 tested, but no region comprising a tRNA gene is lost in *radA* plants. Thus, we could not  
594 correlate the developmental phenotypes with the reduced expression of a transcript for an  
595 OXPHOS subunit, or of a factor required for OXPHOS subunit synthesis and assembly.  
596 Nevertheless, the increase in ectopic recombination can lead to the creation and expression  
597 of chimeric genes that could encode toxic proteins (Hanson and Bentolila, 2004; Touzet and  
598 Meyer, 2014).

599 Despite dual targeting, the absence of RADA does not seem to affect the chloroplast.  
600 As for *recG1* (Wallet et al., 2015), the stoichiometry of the cpDNA is not modified in *radA*  
601 mutants. It is possible that RADA does not act in the chloroplast, or that the absence of IRs  
602 in the cpDNA of Arabidopsis limits the possibilities of ectopic recombination that could  
603 destabilize the genome. RECA2 is also targeted to the chloroplast, but its loss also does not  
604 seem to have any deleterious effects in the maintenance of the cpDNA (Miller-Messmer et  
605 al., 2012; Shedge et al., 2007).

606 The cell cycle is an energy demanding process that can be arrested by defects in  
607 respiration or photosynthesis (Riou-Khamlichi et al., 2000). Such alterations of organellar

608 functions can be perceived by the nucleus through retrograde signals leading to a modulation  
609 of plant development *via* the control of the cell cycle (Hudik et al., 2014). The severe  
610 developmental phenotypes elicited in *radA* mutants indeed seem to partially result from a  
611 mitochondrial retrograde signaling that promotes an inhibition of cell cycle progression. That  
612 was suggested by the increased size of epidermal cells and the reduction in the number of  
613 stomata, and confirmed by determination of nuclear ploidy and incorporation of EdU. The  
614 increase of *SMR5* and *ANAC085* transcripts in the *radA* mutants also indicates that the cell  
615 cycle is affected by RADA deficiency. *SMR5* (with *SMR7*) is an inhibitor of the cell cycle  
616 induced by oxidative, hydric or light stresses (Dubois et al., 2018; Hudik et al., 2014; Yi et al.,  
617 2014). These stresses produce ROS that can be retrograde signals to the nucleus (Mittler et  
618 al., 2011). Inhibition of the cell cycle can lead to early differentiation of cells causing stunting  
619 (Hudik et al., 2014). It is thus possible that mitochondrial genome instability in the *radA*  
620 mutants results in sub-optimal function of the OXPHOS complexes and in ROS production,  
621 triggering a DNA-damage response, the arrest of the cell cycle and the developmental  
622 phenotypes observed.

623 Since accumulation of ROS has been shown to lead to SOG1 phosphorylation (Yi et  
624 al., 2014), the cell cycle inhibition observed in *radA* could result from SOG1-dependent DDR  
625 activation. Indeed, DDR mutants, and particularly *sog1*, are hypersensitive to genotoxins  
626 targeting organelles (Pedroza-Garcia et al., 2019), supporting the notion that DDR can be  
627 activated through retrograde signaling involving ROS production. In line with this hypothesis,  
628 expression of the direct SOG1 target *SMR5* was increased in *radA* mutants. However, other  
629 SOG1 targets such as *BRCA1* or *CYCB1;1* were only mildly induced in *radA* mutants,  
630 suggesting that the SOG1 pathway was not fully activated. Interestingly, the *ANAC085*  
631 transcription factor, and to a lesser extent *ANAC044*, which are known SOG1 targets but  
632 have also been shown to respond to abiotic stress independently of SOG1, were induced in  
633 *radA*, which could account for the inhibition of cell proliferation. In addition, *ANAC044* and  
634 *ANAC085* are required for the induction of programmed cell death in response to DNA  
635 damage (Takahashi et al., 2019). The accumulation of nuclei with intermediate DNA content  
636 could thus reflect the induction of cell death in the *radA* mutants. Further work will thus be  
637 required to fully decipher how defects in the maintenance of the mitochondrial genome  
638 integrity can lead to the inhibition of cell cycle progression.

639

## 640 **METHODS**

641

### 642 **Plant Material:**

643 Arabidopsis T-DNA insertion mutant lines, all in the Col-0 background, were obtained from  
644 the Nottingham Arabidopsis Stock Centre (*radA-1*: SALK\_097880, *radA-2*:  
645 WiscDsLoxHs058\_03D). Plant genotypes were determined by PCR using gene and T-DNA  
646 specific primers. Seeds were stratified for 3 days at 4 °C and plants were grown on soil or on  
647 half-strength MS medium (Duchefa) supplemented with 1 % (w/v) Sucrose, at 22 °C. DNA  
648 was extracted using the cetyltrimethylammonium bromide method. RNA was extracted using  
649 TRI Reagent (Molecular Research Centre, Inc.). For RT-qPCR experiments, 5 µg of RNA  
650 were depleted from contaminating DNA by treatment with RQ1 RNase-free DNase  
651 (Promega) and were reverse-transcribed with Superscript IV Reverse Transcriptase (Thermo  
652 Fisher Scientific), according to the manufacturer's protocol using random hexamers. For  
653 mutant complementation, the WT *RADA* gene and promoter sequence was cloned in binary  
654 vector pGWB13, fused to a C-terminal 3xHA tag, and used to transform heterozygous *radA-1*  
655 plants. Expression of the transgene in the T1 transformants was monitored by western-blot  
656 with a HA-specific antibody.

657

### 658 **Bioinformatics analysis**

659 Bacterial and plant sequences were identified in the databases by BLASTP and TBLASTN.  
660 Alignments were constructed with ClustalW implemented in the Macvector package using the  
661 Gonnet matrix. Phylogenetic trees were built with PhyML v3.1 ([www.phylogeny.fr](http://www.phylogeny.fr)) using the  
662 neighbor-joining method implemented in the BioNJ program. Graphical representations were  
663 performed with TreeDyn (v198.3). The Arabidopsis RADA structure was modeled on the  
664 structure of RadA from *Streptococcus pneumoniae* (pdb: 5LKM), using Modeller  
665 ([http://salilab.org/modeller/about\\_modeller.html](http://salilab.org/modeller/about_modeller.html)).

666

### 667 **Intracellular Localization**

668 The cDNA sequence coding the Arabidopsis RADA N-terminal domain (first 174 codons) was  
669 cloned into the pUCAP-GFP vector, derived from pCK-GFP3 (Vermel et al., 2002), and the  
670 expressing cassette under control of a double 35S promoter was transferred to the binary  
671 vector pBIN+ (van Engelen et al., 1995). Arabidopsis Col-0 plants were transformed by the  
672 floral dip method and leaves of selected transformants were observed on a Zeiss LSM700  
673 confocal microscope. The fluorescence of GFP and chlorophyll was observed at 505 to 540  
674 nm and beyond 650 nm, respectively. For mitochondrial co-localization, leaves were infiltrated  
675 with a 1/1000 dilution of MitoTracker® orange (Thermo Fisher Scientific) solution. Excitation  
676 was at 555 nm and observation at 560-615 nm.

677

678 **In vitro strand exchange reaction:**

679 Recombination assays were performed with single-strand linear  $\Phi$ X174 virion DNA and  
680 double strand circular  $\Phi$ X174 RFI DNA (New England Biolabs) linearized with PstI in 20 mM  
681 Tris-acetate pH 7.4, 12.5 mM phosphocreatine, 10 U/mL creatine kinase, 3 mM ammonium  
682 glutamate, 1 mM dithiothreitol, 2 % glycerol and 11 mM magnesium acetate. In our  
683 conditions, 20.1  $\mu$ M (in nucleotides) linear single strand DNA (ssDNA), 6.7  $\mu$ M RecA (New  
684 England Biolabs), 2  $\mu$ M RADA are incubated with buffer for 8 min at 37 °C. Then, 20.1  $\mu$ M (in  
685 nucleotides) linear double-strand DNA (dsDNA) is added and the whole reaction is incubated  
686 for 5 min at 37 °C. Finally, strand exchange is initiated by adding 3 mM ATP and 3.1  $\mu$ M SSB  
687 (Merck). Aliquots are stopped at indicated times by addition of 12  $\mu$ M EDTA and 0.8 % SDS.  
688 Strand exchange products were analyzed on 0.8 % agarose gels run at 4 °C in Tris-acetate  
689 EDTA buffer (TAE) at 50 V and visualized after migration by ethidium bromide staining. For  
690 reactions terminated in the absence of RecA, the RecA-initiated strand exchange reaction  
691 was stopped at the indicated time and DNA was deproteinized by phenol-chloroform  
692 extraction followed by ethanol precipitation. The DNA pellet was solubilized in reaction buffer,  
693 2  $\mu$ M RADA was added and the reaction was further incubated at 37 °C for the indicated  
694 time, before quenching with 12  $\mu$ M EDTA and 0.8 % SDS.

695

696 **DNA Binding Assays**

697 For electrophoretic mobility shift assays (EMSA) the purified recombinant protein (50-  
698 500 fmol according to the experience) was incubated with oligonucleotide probes (0.01 pmol-  
699 10 fmol) that were 5'-radiolabeled with [ $\gamma$ -<sup>32</sup>P]ATP (5000 Ci/mmol; PerkinElmer Life Science)  
700 and T4 polynucleotide kinase (Thermo Fisher Scientific). Different dsDNA structures were  
701 prepared by annealing the radiolabeled sense oligonucleotides with a twofold excess of  
702 unlabeled complementary oligonucleotide and purified on non-denaturing polyacrylamide  
703 gels. The binding reactions were performed in 20 mM Tris-HCl pH 7.5, 50 mM KCl, 5 mM  
704 MgCl<sub>2</sub>, 0.5 mM EDTA, 10 % glycerol, 1 mM DTT and protease inhibitors (Complete-EDTA;  
705 Roche Molecular Biochemicals), incubated at 20 °C for 20 min and run on 8 or 4.5 %  
706 polyacrylamide gels in Tris-Borate-EDTA buffer at 4 °C. After drying gels were revealed  
707 using a Amersham Typhoon phosphorimager (GE Healthcare Life Sciences). For competition  
708 assays, labeled probe and unlabeled competitor were added simultaneously to the reaction  
709 mixture.

710

711 **Recombinant proteins**

712 Constructs pET28-RADA and pET28A-RADA[K201A] were used to express recombinant  
713 proteins in *E. coli* Rosetta 2 (DE3) pLysS (Novagen). Transformed bacteria were grown at

714 37 °C until OD<sub>600nm</sub> = 0.6. Cultures were then chilled to 4 °C for 30 min before addition of  
715 0.5 mM isopropyl b-D-1-thiogalactopyranoside (IPTG) and overnight incubation at 18 °C.  
716 After growth cells were pelleted, resuspended in 50 mM Tris-HCl pH 8.0, 5 % glycerol,  
717 300 mM NaCl, 10 mM imidazole, supplemented with 1 mM PMSF and 1 X cComplete  
718 protease inhibitors (Merck) and lysed with a French press under 1200 PSI. The crude lysate  
719 was sonicated for 3 min, clarified by 25 min centrifugation at 17700 g and filtrated trough a  
720 Filtropur S plus 0.2 µm filter (Sarstedt). The recombinant RADA and RADA[K201A] proteins  
721 were affinity purified in a precalibrated HisTrap FF Crude (GE Healthcare Life Sciences)  
722 column run at 0.5 mL/min, washed with 50 mM Tris-HCl pH 8.0, 300 mM NaCl, 5 % glycerol,  
723 50 mM imidazole and eluted with a 50-500 mM imidazole gradient. The recombinant protein  
724 fractions was further purified by gel filtration on Superdex S200 columns and aliquots were  
725 flash frozen in liquid nitrogen and stored at -80 °C. RADA concentration was determined by  
726 spectrophotometry using an extinction coefficient of 42,440 M<sup>-1</sup> cm<sup>-1</sup>.

727

### 728 **Bacterial complementation**

729 The *E. coli* TOP10 strain was used for routine cloning, whereas the BW25113 *radA+* and  
730 JW4352 *radA785(del)::kan* were used for complementation assays. The Arabidopsis RADA  
731 cDNA (sequence coding for amino acids 137 to 627) or the *E. coli* RadA/Sms sequence were  
732 cloned between the PstI and BamHI restriction sites of the pACYCLacZ vector  
733 (Miller-Messmer et al. 2012) under the control of the *lac* promoter. Both constructs were  
734 introduced in the JW4352 strain. The pACYCLacZ empty vector was introduced in the  
735 BW25113 and JW4352 strains as control. Bacteria were grown in LB supplemented with  
736 10 µg/mL chloramphenicol till OD<sub>600nm</sub> = 0.4 before addition of 2.5 mM IPTG. At OD<sub>600nm</sub> = 1.2  
737 bacteria were diluted 10<sup>4</sup> fold and grown on LB agar plates supplemented with 15 nM  
738 ciprofloxacin, 2 mM IPTG and 10 µg/mL chloramphenicol.

739

### 740 **qPCR Analysis**

741 qPCR experiments were performed in a LightCycler480 (Roche) in a total volume of 6 µL  
742 containing 0.5 mM of each specific primer and 3µl of SYBR Green I Master Mix (Roche  
743 Applied Science). The second derivative maximum method was used to determine Cp values  
744 and PCR efficiencies were determined using LinRegPCR software (<http://LinRegPCR.nl>).  
745 Three technical replicates were performed for each experiment. Results of qPCR and RT-  
746 qPCR analysis were standardized as previously described (Wallet et al., 2015).  
747 Quantification of mtDNA and cpDNA copy numbers used a set of primer pairs located along  
748 the organellar genomes, as described previously (Wallet et al. 2015; Le Ret et al. 2018).  
749 Results were normalized against the UBQ10 (At4G05320) and ACT1 (At2G37620) nuclear  
750 genes. The accumulation of ectopic recombination in mtDNA was quantified using primers

751 flanking each repeats, as described (Miller-Messmer et al. 2012). The COX2 (AtMG00160)  
752 and 18S rRNA (AtMG01390) mitochondrial genes and the 16S rRNA (AtCG00920)  
753 chloroplast gene were used for normalization. For RT-qPCR experiments the GAPDH  
754 (At1G13440) and ACT2 (At3G18780) transcripts were used as standards.

755

#### 756 **Flow cytometry and EdU staining**

757 Nuclear DNA content was measured in leaves of 20-d-old seedlings, using the CyStain UV  
758 Precise P Kit (Partec) according to the manufacturer's instructions. Nuclei were released in  
759 nuclei extraction buffer (Partec) by chopping with a razor blade, stained with 4',6-diamidino-  
760 2-phenylindole (DAPI) buffer and filtered through a 30 µM Celltrics mesh (Partec). Between  
761 20,000 and 30,000 isolated nuclei were used for each ploidy level measurement using the  
762 Attune Cytometer and the Attune Cytometer software (Life Technologies). At least four  
763 independent biological replicates were analyzed. EdU staining was as described (Pedroza-  
764 Garcia et al., 2016). For each root tip (n>10), the number of mitotic events was counted  
765 directly under the microscope.

766

#### 767 **Accession Numbers**

768 Sequence data from this article can be found in the Arabidopsis Genome Initiative or  
769 GenBank/EMBL databases under the following accession numbers: *RADA*, At5g50340;  
770 *RECG1*, At2g01440; *RECA3*, At3g10140; *ANAC044*, At3g01600; *ANAC085*, At5g14490;  
771 *KNOLLE*, At1g08560; *CDKB1;2*, At2g38620; *EHD2*, At4g05520; *PLE*, At5g51600; *MYB3R3*,  
772 At3g09370; *MYB3R4*, At5g11510; *CYCD3;1*, At4g34160; *CYCD3;2*, At5g67260; *CYCD3;3*,  
773 At3g50070; *MCM2*, At1g44900; *MCM3*, At5g46280; *PCNA1*, At1g07370; *PCNA2*, At2g29270;  
774 *CDT1a*, At2g31270; *CycB1;1*, At4g37490; *WEE1*, At1g02970; *BRCA1*, At4g21070 ; *RAD51*,  
775 At5g20850 ; *XRI1*, At5g48720; *SIM*, At5g04470; *SMR1*, At3g10525; *SMR2*, At1g08180 ;  
776 *SMR3*, At5g02420; *SMR4*, At5g02220; *SMR5*, At1g07500; *SMR6*, At5g40460; *SMR7*,  
777 At3g27630; *SMR8*, At1g10690; *SMR9*, At1g51355; *SMR10*, At2g28870; *SMR11*, At2g28330;  
778 *SMR12*, At2g37610; *SMR13*, At5g59360.

779

780

781 **SUPPLEMENTAL DATA FILES**

782

783 **Supplemental Figure 1.** Phylogenetic distribution of RADA.

784

785 **Supplemental Figure 2.** Sequences alignment.

786

787 **Supplemental Figure 3.** Effect of the point mutation K201A.

788

789 **Supplemental Figure 4.** Expression, purification and characterization of recombinant RADA.

790

791 **Supplemental Figure 5.** Sequence specificity of RADA binding to ssDNA.

792

793 **Supplemental Figure 6.** Transmission electron microscope (TEM) images.

794

795 **Supplemental Figure 7.** No apparent effect of RADA deficiency on cpDNA stability.

796

797 **Supplemental Table 1.** Oligonucleotides.

798

799

800 **Author Contributions**

801 NC, CN, CR, MLR, ME and JMG performed research. NC, CR, MB, AD and JMG designed  
802 the research and analyzed data. NC and JMG wrote the paper.

803

804 **Acknowledgments**

805 We are grateful to Dr. Sandra Noir for help with flow cytometry, and to Dr. Patrice Polard and  
806 Dr. Bénédicte Michel for helpful discussions. This work has been published under the  
807 framework of the LABEX [ANR-11-LABX-0057\_MITOCROSS] and benefits from a funding  
808 from the state managed by the French National Research Agency as part of the  
809 "Investments for the future" program.

810

811

## 812 **References**

813

814 **Abraham, R.T.** (2001). Cell cycle checkpoint signaling through the ATM and ATR kinases.  
815 *Genes Dev.* **15**: 2177-2196.

816 **Arrieta-Montiel, M.P., Shedge, V., Davila, J., Christensen, A.C., and Mackenzie, S.A.**  
817 (2009). Diversity of the Arabidopsis mitochondrial genome occurs via nuclear-  
818 controlled recombination activity. *Genetics* **183**: 1261-1268.

819 **Backert, S., Lynn Nielsen, B., and Börner, T.** (1997). The mystery of the rings: structure  
820 and replication of mitochondrial genomes from higher plants. *Trends in Plant Science*  
821 **2**: 477-483.

822 **Beam, C.E., Saveson, C.J., and Lovett, S.T.** (2002). Role for radA/sms in recombination  
823 intermediate processing in *Escherichia coli*. *J. Bacteriol.* **184**: 6836-6844.

824 **Bendich, A.J.** (1996). Structural analysis of mitochondrial DNA molecules from fungi and  
825 plants using moving pictures and pulsed-field gel electrophoresis. *J. Mol. Biol.* **255**:  
826 564-588.

827 **Boesch, P., Weber-Lotfi, F., Ibrahim, N., Tarasenko, V., Cosset, A., Paulus, F.,**  
828 **Lightowers, R.N., and Dietrich, A.** (2011). DNA repair in organelles: Pathways,  
829 organization, regulation, relevance in disease and aging. *Biochim. Biophys. Acta*  
830 **1813**: 186-200.

831 **Brenneman, M.A., Wagener, B.M., Miller, C.A., Allen, C., and Nickoloff, J.A.** (2002).  
832 XRCC3 controls the fidelity of homologous recombination: roles for XRCC3 in late  
833 stages of recombination. *Mol. Cell* **10**: 387-395.

834 **Budar, F., Touzet, P., and De Paepe, R.** (2003). The nucleo-mitochondrial conflict in  
835 cytoplasmic male sterilities revisited. *Genetica* **117**: 3-16.

836 **Christensen, A.C.** (2013). Plant mitochondrial genome evolution can be explained by DNA  
837 repair mechanisms. *Genome Biol. Evol.* **5**: 1079-1086.

838 **Christensen, A.C.** (2018). Mitochondrial DNA Repair and Genome Evolution. In *Annual*  
839 *Plant Reviews online*, pp. 11-32.

840 **Chun, J., Buechelmaier, E.S., and Powell, S.N.** (2013). Rad51 paralog complexes BCDX2  
841 and CX3 act at different stages in the BRCA1-BRCA2-dependent homologous  
842 recombination pathway. *Mol. Cell. Biol.* **33**: 387-395.

843 **Cooper, D.L., Boyle, D.C., and Lovett, S.T.** (2015). Genetic analysis of *Escherichia coli*  
844 RadA: functional motifs and genetic interactions. *Mol. Microbiol.* **95**: 769-779.

845 **Cooper, D.L., and Lovett, S.T.** (2016). Recombinational branch migration by the RadA/Sms  
846 paralog of RecA in *Escherichia coli*. *eLife* **5**.



- 847 **Cox, M.M.** (2007). Motoring along with the bacterial RecA protein. *Nat. Rev. Mol. Cell Biol.* **8**:  
848 127-138.
- 849 **Dubois, M., Selden, K., Bediee, A., Rolland, G., Baumberger, N., Noir, S., Bach, L.,**  
850 **Lamy, G., Granier, C., and Genschik, P.** (2018). SIAMESE-RELATED1 Is  
851 Regulated Posttranslationally and Participates in Repression of Leaf Growth under  
852 Moderate Drought. *Plant Physiol.* **176**: 2834-2850.
- 853 **Forget, A.L., and Kowalczykowski, S.C.** (2012). Single-molecule imaging of DNA pairing  
854 by RecA reveals a three-dimensional homology search. *Nature* **482**: 423-427.
- 855 **Fuchs, P., Rugen, N., Carrie, C., Elsasser, M., Finkemeier, I., Giese, J., Hildebrandt,**  
856 **T.M., Kuhn, K., Maurino, V.G., Ruberti, C., Schallenberg-Rudinger, M.,**  
857 **Steinbeck, J., Braun, H.P., Eubel, H., Meyer, E.H., Muller-Schussele, S.J., and**  
858 **Schwarzlander, M.** (2019). Single organelle function and organization as estimated  
859 from Arabidopsis mitochondrial proteomics. *Plant J.* 10.1111/tpj.14534.
- 860 **Gualberto, J.M., and Newton, K.J.** (2017). Plant Mitochondrial Genomes: Dynamics and  
861 Mechanisms of Mutation. *Annu Rev Plant Biol* **68**: 225-252.
- 862 **Hanson, M.R., and Bentolila, S.** (2004). Interactions of mitochondrial and nuclear genes  
863 that affect male gametophyte development. *Plant Cell* **16 Suppl**: S154-169.
- 864 **Hudik, E., Yoshioka, Y., Domenichini, S., Bourge, M., Soubigout-Tacconat, L.,**  
865 **Mazubert, C., Yi, D., Bujaldon, S., Hayashi, H., De Veylder, L., Bergounioux, C.,**  
866 **Benhamed, M., and Raynaud, C.** (2014). Chloroplast dysfunction causes multiple  
867 defects in cell cycle progression in the Arabidopsis crumpled leaf mutant. *Plant*  
868 *Physiol.* **166**: 152-167.
- 869 **Inoue, M., Fukui, K., Fujii, Y., Nakagawa, N., Yano, T., Kuramitsu, S., and Masui, R.**  
870 (2017). The Lon protease-like domain in the bacterial RecA paralog RadA is required  
871 for DNA binding and repair. *J. Biol. Chem.* **292**: 9801-9814.
- 872 **Ishibashi, T., Isogai, M., Kiyohara, H., Hosaka, M., Chiku, H., Koga, A., Yamamoto, T.,**  
873 **Uchiyama, Y., Mori, Y., Hashimoto, J., Ausio, J., Kimura, S., and Sakaguchi, K.**  
874 (2006). Higher plant RecA-like protein is homologous to RadA. *DNA Repair (Amst.)* **5**:  
875 80-88.
- 876 **Janska, H., Sarria, R., Woloszynska, M., Arrieta-Montiel, M., and Mackenzie, S.A.**  
877 (1998). Stoichiometric shifts in the common bean mitochondrial genome leading to  
878 male sterility and spontaneous reversion to fertility. *Plant Cell* **10**: 1163-1180.
- 879 **Manchekar, M., Scissum-Gunn, K., Song, D., Khazi, F., Mclean, S.L., and Nielsen, B.L.**  
880 (2006). DNA recombination activity in soybean mitochondria. *J. Mol. Biol.* **356**: 288-  
881 299.
- 882 **Maréchal, A., and Brisson, N.** (2010). Recombination and the maintenance of plant  
883 organelle genome stability. *New Phytologist* **186**: 299-317.

- 884 **Marie, L., Rapisarda, C., Morales, V., Bergé, M., Perry, T., Soulet, A.-L., Gruget, C.,**  
885 **Remaut, H., Fronzes, R., and Polard, P.** (2017). Bacterial RadA is a DnaB-type  
886 helicase interacting with RecA to promote bidirectional D-loop extension. *Nat.*  
887 *Commun.* **8**: 15638.
- 888 **Miller-Messmer, M., Kuhn, K., Bichara, M., Le Ret, M., Imbault, P., and Gualberto, J.M.**  
889 (2012). RecA-dependent DNA repair results in increased heteroplasmy of the  
890 *Arabidopsis* mitochondrial genome. *Plant Physiol.* **159**: 211-226.
- 891 **Mittler, R., Vanderauwera, S., Suzuki, N., Miller, G., Tognetti, V.B., Vandepoele, K.,**  
892 **Gollery, M., Shulaev, V., and Van Breusegem, F.** (2011). ROS signaling: the new  
893 wave? *Trends Plant Sci.* **16**: 300-309.
- 894 **Mower, J.P., Touzet, P., Gummow, J.S., Delph, L.F., and Palmer, J.D.** (2007). Extensive  
895 variation in synonymous substitution rates in mitochondrial genes of seed plants.  
896 *BMC Evol. Biol.* **7**: 135.
- 897 **Nowack, M.K., Harashima, H., Dissmeyer, N., Zhao, X., Bouyer, D., Weimer, A.K., De**  
898 **Winter, F., Yang, F., and Schnittger, A.** (2012). Genetic framework of cyclin-  
899 dependent kinase function in *Arabidopsis*. *Dev. Cell* **22**: 1030-1040.
- 900 **Odahara, M., Masuda, Y., Sato, M., Wakazaki, M., Harada, C., Toyooka, K., and Sekine,**  
901 **Y.** (2015). RECG maintains plastid and mitochondrial genome stability by  
902 suppressing extensive recombination between short dispersed repeats. *PLoS Genet.*  
903 **11**: e1005080.
- 904 **Pedroza-Garcia, J.A., Domenichini, S., Mazubert, C., Bourge, M., White, C., Hudik, E.,**  
905 **Bounon, R., Tariq, Z., Delannoy, E., Del Olmo, I., Pineiro, M., Jarillo, J.A.,**  
906 **Bergounioux, C., Benhamed, M., and Raynaud, C.** (2016). Role of the Polymerase  
907 sub-unit DPB2 in DNA replication, cell cycle regulation and DNA damage response in  
908 *Arabidopsis*. *Nucleic Acids Res.* **44**: 7251-7266.
- 909 **Pedroza-Garcia, J.A., Najera-Martinez, M., Mazubert, C., Aguilera-Alvarado, P., Drouin-**  
910 **Wahbi, J., Sanchez-Nieto, S., Gualberto, J.M., Raynaud, C., and Plasencia, J.**  
911 (2019). Role of pyrimidine salvage pathway in the maintenance of organellar and  
912 nuclear genome integrity. *Plant J.* **97**: 430-446.
- 913 **Peres, A., Churchman, M.L., Hariharan, S., Himanen, K., Verkest, A., Vandepoele, K.,**  
914 **Magyar, Z., Hatzfeld, Y., Van Der Schueren, E., Beemster, G.T., Frankard, V.,**  
915 **Larkin, J.C., Inze, D., and De Veylder, L.** (2007). Novel plant-specific cyclin-  
916 dependent kinase inhibitors induced by biotic and abiotic stresses. *J. Biol. Chem.*  
917 **282**: 25588-25596.
- 918 **Qing, Y., Yamazoe, M., Hirota, K., Dejsuphong, D., Sakai, W., Yamamoto, K.N., Bishop,**  
919 **D.K., Wu, X., and Takeda, S.** (2011). The epistatic relationship between BRCA2 and  
920 the other RAD51 mediators in homologous recombination. *PLoS Genet.* **7**: e1002148.

- 921 **Ragunathan, K., Liu, C., and Ha, T.** (2012). RecA filament sliding on DNA facilitates  
922 homology search. *eLife* **1**: e00067.
- 923 **Riou-Khamlichi, C., Menges, M., Healy, J.M., and Murray, J.A.** (2000). Sugar control of  
924 the plant cell cycle: differential regulation of Arabidopsis D-type cyclin gene  
925 expression. *Mol. Cell. Biol.* **20**: 4513-4521.
- 926 **Shedge, V., Arrieta-Montiel, M., Christensen, A.C., and Mackenzie, S.A.** (2007). Plant  
927 mitochondrial recombination surveillance requires unusual RecA and MutS homologs.  
928 *Plant Cell* **19**: 1251-1264.
- 929 **Sloan, D.B.** (2013). One ring to rule them all? Genome sequencing provides new insights  
930 into the 'master circle' model of plant mitochondrial DNA structure. *New Phytologist*  
931 **200**: 978-985.
- 932 **Sloan, D.B., Wu, Z., and Sharbrough, J.** (2018). Correction of Persistent Errors in  
933 Arabidopsis Reference Mitochondrial Genomes. *Plant Cell* **30**: 525-527.
- 934 **Small, I., Suffolk, R., and Leaver, C.J.** (1989). Evolution of plant mitochondrial genomes via  
935 substoichiometric intermediates. *Cell* **58**: 69-76.
- 936 **Takahashi, N., Ogita, N., Takahashi, T., Taniguchi, S., Tanaka, M., Seki, M., and Umeda,**  
937 **M.** (2019). A regulatory module controlling stress-induced cell cycle arrest in  
938 Arabidopsis. *eLife* **8**.
- 939 **Touzet, P., and Meyer, E.H.** (2014). Cytoplasmic male sterility and mitochondrial  
940 metabolism in plants. *Mitochondrion* **19 Pt B**: 166-171.
- 941 **Vermel, M., Guermann, B., Delage, L., Grienenberger, J.M., Marechal-Drouard, L., and**  
942 **Gualberto, J.M.** (2002). A family of RRM-type RNA-binding proteins specific to plant  
943 mitochondria. *Proc. Natl. Acad. Sci. U. S. A.* **99**: 5866-5871.
- 944 **Vitart, V., Depaepe, R., Mathieu, C., Chetrit, P., and Vedel, F.** (1992). Amplification of  
945 substoichiometric recombinant mitochondrial DNA sequences in a nuclear, male  
946 sterile mutant regenerated from protoplast culture in *Nicotiana sylvestris*. *Mol. Gen.*  
947 *Genet.* **233**: 193-200.
- 948 **Wallet, C., Le Ret, M., Bergdoll, M., Bichara, M., Dietrich, A., and Gualberto, J.M.** (2015).  
949 The RECG1 DNA Translocase Is a Key Factor in Recombination Surveillance,  
950 Repair, and Segregation of the Mitochondrial DNA in Arabidopsis. *Plant Cell* **27**:  
951 2907-2925.
- 952 **Weimer, A.K., Biedermann, S., Harashima, H., Roodbarkelari, F., Takahashi, N.,**  
953 **Foreman, J., Guan, Y., Pochon, G., Heese, M., Van Damme, D., Sugimoto, K.,**  
954 **Koncz, C., Doerner, P., Umeda, M., and Schnittger, A.** (2016). The plant-specific  
955 CDKB1-CYCB1 complex mediates homologous recombination repair in Arabidopsis.  
956 *EMBO J.* **35**: 2068-2086.

- 957 **West, S.C.** (1997). Processing of recombination intermediates by the RuvABC proteins.  
958 *Annu. Rev. Genet.* **31**: 213-244.
- 959 **Whitby, M.C., Vincent, S.D., and Lloyd, R.G.** (1994). Branch migration of Holliday  
960 junctions: identification of RecG protein as a junction specific DNA helicase. *EMBO J.*  
961 **13**: 5220-5228.
- 962 **Woloszynska, M., and Trojanowski, D.** (2009). Counting mtDNA molecules in *Phaseolus*  
963 *vulgaris*: sublimons are constantly produced by recombination via short repeats and  
964 undergo rigorous selection during substoichiometric shifting. *Plant Mol. Biol.* **70**: 511-  
965 521.
- 966 **Xu, Y.Z., Santamaria Rde, L., Viridi, K.S., Arrieta-Montiel, M.P., Razvi, F., Li, S., Ren, G.,**  
967 **Yu, B., Alexander, D., Guo, L., Feng, X., Dweikat, I.M., Clemente, T.E., and**  
968 **Mackenzie, S.A.** (2012). The chloroplast triggers developmental reprogramming  
969 when mutS HOMOLOG1 is suppressed in plants. *Plant Physiol.* **159**: 710-720.
- 970 **Yi, D., Alvim Kamei, C.L., Cools, T., Vanderauwera, S., Takahashi, N., Okushima, Y.,**  
971 **Eekhout, T., Yoshiyama, K.O., Larkin, J., Van Den Daele, H., Conklin, P., Britt,**  
972 **A., Umeda, M., and De Veylder, L.** (2014). The Arabidopsis SIAMESE-RELATED  
973 cyclin-dependent kinase inhibitors SMR5 and SMR7 regulate the DNA damage  
974 checkpoint in response to reactive oxygen species. *Plant Cell* **26**: 296-309.
- 975 **Yoshiyama, K.O., Kobayashi, J., Ogita, N., Ueda, M., Kimura, S., Maki, H., and Umeda,**  
976 **M.** (2013). ATM-mediated phosphorylation of SOG1 is essential for the DNA damage  
977 response in Arabidopsis. *EMBO Rep.* **14**: 817-822.
- 978 **Yoshiyama, K.O.** (2016). SOG1: a master regulator of the DNA damage response in plants.  
979 *Genes Genet. Syst.* **90**: 209-216.
- 980 **Zaegel, V., Guermann, B., Le Ret, M., Andres, C., Meyer, D., Erhardt, M., Canaday, J.,**  
981 **Gualberto, J.M., and Imbault, P.** (2006). The plant-specific ssDNA binding protein  
982 OSB1 is involved in the stoichiometric transmission of mitochondrial DNA in  
983 Arabidopsis. *Plant Cell* **18**: 3548-3563.
- 984
- 985

## 986 **FIGURE LEGENDS**

### 987 **Figure 1. Arabidopsis RADA is targeted to both chloroplasts and mitochondria.**

988 The RADA:GFP fusion protein was constitutively expressed in transgenic plants and its  
989 location observed in leaf epidermal cells. It co-localized with both chloroplasts  
990 (autofluorescence of chlorophyll) mitochondria (red fluorescence of MitoTracker).

991

### 992 **Figure 2. The Arabidopsis RADA is structurally and functionally homologous to** 993 **bacterial RadA.**

994 **(A)** The modular structure of plant RADA is similar to the one from bacteria, with a N-terminal  
995 zinc-finger (C4), an helicase and Lon-protease-like domains (H and P domains respectively).  
996 Plant precursor proteins have an N-terminal extension containing an organellar targeting  
997 sequence (OTS). **(B)** Model of Arabidopsis RADA superposed on the known structure of *S.*  
998 *pneumoniae* (in gray) (Marie et al., 2017). The color code of relevant domains is as in A). A  
999 bound ADP and the Mg<sup>2+</sup> ion (yellow ball) are shown. **(C)** Complementation of an *E. coli radA*  
1000 mutant ( $\Delta$ RadA) for growth in the presence of genotoxic ciprofloxacin (CIP). Arabidopsis  
1001 RADA (*At*-RADA) complements the mutation as efficiently as the bacterial one (*Ec*-RadA)  
1002 cloned in the same expression vector.

1003

### 1004 **Figure 3. DNA-binding and branch-migration activities of RADA.**

1005 **(A)** EMSA experiments showing that RADA binds any ssDNA-containing DNA structure with  
1006 higher affinity than dsDNA. Lower and higher molecular weight complexes are indicated by  
1007 white and black arrowheads respectively **(B)** Analysis on low concentration gel (4.5 % as  
1008 compared to 8 % in A) of the formation of a high-molecular weight RADA filament on ssDNA,  
1009 which is promoted by ATP or ADP (1 mM). The K201A mutant protein binds with equivalent  
1010 affinity as the WT protein. Increasing concentrations of RADA used in A and B are indicated  
1011 by the grey triangles. **(C)** In a *in vitro* strand-invasion reaction plant RADA accelerates  
1012 branch-migration of DNA heteroduplexes initiated by RecA. An explanation of the different  
1013 substrates and products is shown below the gel. **(D)** Ratio of final product as compared to  
1014 the initial linear dsDNA substrate in 6 independent experiments, showing that in the presence  
1015 of RADA there is faster resolution of branched intermediates. **(E)** RADA can alone finalize  
1016 branch-migration initiated by RecA: a reaction at T=7 min was arrested by deproteination (left  
1017 panel) and the DNA purified. Without addition of RecA or RADA there is no spontaneous  
1018 progression of the reaction (middle panel), but RADA alone can resolve intermediates into  
1019 the final product (right panel). **(F)** RADA alone cannot initiate strand invasion. **(G)** Mutation of  
1020 the ATPase Walker domain of RADA (K201A) inhibits the reaction.

1021

1022 **Figure 4. Arabidopsis *radA* mutants and phenotypes.**

1023 (A) Schematic representation of the Arabidopsis *RADA* gene. Coding sequences are in black  
1024 and 5'- and 3'-UTRs are in gray. The position of the T-DNA insertions in *radA* mutant lines is  
1025 shown. (B) *radA* plants show severe growth retardation, with distorted leaves presenting  
1026 chlorotic sector. These can be complemented by expression of HA-tagged RADA  
1027 (RADA:HA) under control of the endogenous promoter. (C) root shortening of *radA* plants.  
1028 (D) Detail of leaves phenotype. (E) Perennial vegetative growth of plants grown on short  
1029 days (8h light), with development of aerial rosettes (4-month old *radA-1* plant).

1030

1031 **Figure 5. Reduced fertility of *radA* plants.**

1032 (A) Comparison of WT and *radA* flower stems showing very small *radA* siliques. (B) *radA*  
1033 siliques have mostly aborted seeds, and the few seeds produced are mostly non-viable. (C)  
1034 Alexander staining of pollen in *radA* anthers as compared to WT, showing little pollen  
1035 production, and an abundance of small and aberrant pollen grains (indicated by arrows). (D)  
1036 Visible and SEM Images showing that no pollen binds to the papillae in *radA* stigma. (E)  
1037 Differential interference contrast images of ovules on crosses between *radA-1* flowers and  
1038 WT pollen. Black arrowheads indicate central cell and egg cell nuclei in unfertilized ovules.  
1039 White arrowheads indicate developing embryos in fertilized ovules, three days after  
1040 pollination (DAP). Only 16 % of *radA* ovules could be fertilized. Scale bar is 50  $\mu$ m. (F) After  
1041 seven DAP the pollinated pistils of *radA* did not develop further.

1042

1043 **Figure 6. Changes in mtDNA sequences stoichiometry in *radA* mutants because of**  
1044 **increased ectopic recombination across repeats.**

1045 (A) Picture of severely affected (*radA-1#1* and *radA-2#1*) and mildly affected (*radA-1#2* and  
1046 *radA-2#2*) seedlings that were analyzed. (B) Scanning of their mtDNA for changes in relative  
1047 copy numbers of the different mtDNA regions. Sequences spaced 5-10 kb apart on the  
1048 mtDNA were quantified by qPCR. Coordinates are those of the Col-0 mtDNA sequence. The  
1049 position of the mtDNA large repeats LR1 and LR2 and of relevant intermediate size repeats  
1050 are shown below the graphic. Regions with changed stoichiometries flanked by repeat pairs  
1051 are shadowed. Error bars are the *SD* values from three technical replicates. (C)  
1052 Accumulation of crossover products from mtDNA repeats L, F and EE in the *radA* seedlings  
1053 relative to WT. Results are in a log<sub>2</sub> scale. The scheme shows the qPCR relative  
1054 quantification of parental sequences 1/1 and 2/2 and of the corresponding crossover  
1055 products 1/2 and 2/1. Results are the mean of three technical replicates, and error bars  
1056 correspond to *SD* values.

1057

1058

1059 **Figure 7. Synergistic effects of the *radA* mutation on *recG1* and *recA3*.**

1060 (A) Crosses of *recG1-2* and *radA-1* (pollen donor) show that double homozygote *recG1 radA*  
1061 plants are as affected as simple homozygote *radA* plants. (B) Crosses and segregation of  
1062 *recA3-2* and *radA-1* (pollen donor) show that double homozygote *recA3 radA* seedlings do  
1063 not grow roots and do not grow further. The phenotype is similar to the one observed for  
1064 *recA2* mutants (Miller-Messmer et al. 2012). The scale bar is 1 mm. (C) qPCR analysis of the  
1065 copy number of mtDNA sequences around and within the region comprised between pair of  
1066 repeats EE, previously shown to generate an episome by recombination in *recG1* plants  
1067 (Wallet et al. 2015). Autonomous replication of the episome is significantly increased in the  
1068 *recG1 radA* double mutant. Results show the mean and SD error bars from 2 or 3 (for  
1069 *recG1 radA*) biological replicates. (D) Scanning of the copy numbers of the different mtDNA  
1070 regions in *recA3 radA*, as described in Figure 6, showing severe reduction of several mtDNA  
1071 regions. Results were compared to those of WT seedling of same size, and are in log scale.

1072

1073 **Figure 8. Accumulation of mitochondrial transcripts in *radA*.**

1074 (A) Representative mitochondrial transcripts were quantified by RT-qPCR, from the RNA of  
1075 10-day old seedlings grown *in vitro*, and normalized against a set of nuclear housekeeping  
1076 genes. The quantification of several transcripts of orfs whose transcription could be  
1077 potentially affected by ectopic recombination involving IRs are shown on the right, in red.  
1078 Results are on a log<sub>2</sub> scale and are the mean from four biological replicates (two pools of  
1079 *radA-1* and two pools of *rad-2* seedlings) and corresponding SD error bars. (B) Chimeric  
1080 *orf195* and *orf315* created by recombination whose transcription is augmented in *radA*  
1081 plants. The regions corresponding to *rps3* and *atp9* sequences are shown in blue. Repeated  
1082 sequences are represented by orange bars. Coordinates on the mtDNA are indicated.

1083

1084 **Figure 9. Cell cycle progression is impaired in *radA* plants.**

1085 (A) Scanning electron microscopy images showing that in *radA* leaves epidermal cells are  
1086 much larger and there are fewer stomata, half the number for the same leaf surface. Scale  
1087 bar is 20  $\mu$ m. (B) Flow-cytometry profile obtained in WT (Col-0) and *radA*. The DNA content  
1088 of nuclei extracted from the first true leaves of 20 day-old plants was analyzed. (C) Ploidy  
1089 distribution, showing decreased endoreduplication in the mutant, with an increased  
1090 proportion of 4C and 8C nuclei and a decreased proportion of 16C nuclei. Values are the  
1091 average  $\pm$  SD of 4 experiments for WT and six experiments for *radA* (n>20 000 nuclei).  
1092 (D) Decreased DNA synthesis in the nuclei of *radA* root tip cells, as evaluated by the ratio  
1093 between EdU positive and DAPI (4',6'-diamidino-2-phénylindol) positive cells. (E) Decreased  
1094 number of cells undergoing mitosis. Significances were calculated by Student's t test. (F) RT-  
1095 qPCR analysis of the expression of a set of cell cycle related genes in 10-day old WT and

1096 *radA* seedlings, revealing activation of *SMR5* and *ANAC085*. Data is represented in a log<sub>2</sub>  
1097 scale and is the mean ± SE of three biological replicates (two pools of seedlings from *radA-1*  
1098 and one from *radA-2*). **(G)** NBT (nitro blue tetrazolium) staining for O<sup>2-</sup> of plants of equivalent  
1099 size grown under same conditions, showing that *radA* mutants accumulate much more ROS  
1100 than WT plants. Scale bar is 1 cm.  
1101



1102

1103 **Supplemental Figure 1.** Phylogenetic distribution of RADA.

1104 Genes coding for RadA-like proteins are found in all bacteria, in land plants, green, brown  
1105 and red algae, diatoms and other organisms of the Stramenopile group. *Arabidopsis thaliana*,  
1106 NP\_199845; *Populus trichocarpa*, EEE84551; *Vitis vinifera*, XP\_002277638; *Oryza sativa*,  
1107 NP\_001056828; *Zea mays*, NP\_001170708; *Selaginella moellendorffii*, XP\_002976563;  
1108 *Physcomitrella patens*, XP\_001757578; *Ostreococcus tauri*, XP\_003084463; *Coccomyxa*  
1109 *subellipsoidea*, XP\_005643141; *Chlorella variabilis*, EFN56488; *Cyanidioschyzon merolae*,  
1110 XP\_005536634; *Galdieria sulphuraria*, XP\_005709405; *Ectocarpus siliculosus*, CBJ25917;  
1111 *Phaeodactylum tricorutum*, XP\_002178713; *Thalassiosira oceanica*, EJK58798;  
1112 *Saprolegnia diclina*, EQC30001; *Phytophthora infestans*, XP\_002904225; *Myxococcus*  
1113 *xanthus*, YP\_629513; *Rickettsia prowazekii*, WP\_014607237; *Neisseria meningitidis*,  
1114 WP\_002258526; *Escherichia coli*, WP\_001458566; *Microcystis aeruginosa*, WP\_002742386;  
1115 *Synechocystis sp.*, WP\_009633429; *Geminocystis herdmanii*, WP\_017296205; *Bacillus*  
1116 *anthracis*, NP\_842650; *Amphibacillus jilinensis*, WP\_017473696.

1117

1118 **Supplemental Figure 2.** Sequences alignment.

1119 Sequence alignment (Clustal W) between representative land plant RADA sequences and  
1120 RadA from proteobacteria and cyanobacteria. The Zinc-finger and KNRFG RadA-specific  
1121 motif are shaded in yellow and blue respectively, and the Walker A and B motifs in green.

1122

1123 **Supplemental Figure 3.** Effect of the point mutation K201A.

1124 Effect of the point mutation K201A (amino acids in green) on the Walker A domain of RadA  
1125 in the binding and hydrolysis of ATP. The structure shown is the one from bacterial RadA  
1126 (Marie et al. 2017), with bound ADP and Mg<sup>2+</sup> ion (sphere). The two phosphate groups of  
1127 ADP are in red.

1128

1129 **Supplemental Figure 4.** Expression, purification and characterization of recombinant RADA.

1130 The *Arabidopsis* RADA sequence minus the first 48 codons corresponding to the OTS was  
1131 cloned in the expression vector pET28a fused to a N-terminal His-tag. The recombinant  
1132 RADA and Walker mutant K201A were expressed in the Rosetta(DE3) strain and purified by  
1133 affinity and gel filtration. **(A)** Coomassie gel staining analysis of the recombinant proteins. **(B)**  
1134 Gel filtration on Superdex S200 showed that RADA purified as two peaks of high molecular  
1135 weight. **(C)** Dynamic light scattering of the protein fraction from peak 2 shows that it is  
1136 monodispersed and corresponding to a size of about 340 kDa, which is consistent with an  
1137 hexameric RADA molecule. **(D)** EMSA analysis of the binding to a ssDNA oligonucleotide.

1138 Fractions corresponding to both peaks give complexes of the same size, although fractions  
1139 of peak 1 give predominantly higher molecular weight complexes.

1140

1141 **Supplemental Figure 5.** Sequence specificity of RADA binding to ssDNA.

1142 A 30-mer ssDNA oligonucleotide (7x[AGTC]AG) was used as probe in EMSA experiments  
1143 with recombinant RADA, and sequence specificity was tested by competition with increasing  
1144 concentrations of the cold homologous oligonucleotide or with 30-oligomers (poly-A, poly-T,  
1145 poly-C and poly-G). Competitor/probe ratios tested were 0; 2.5; 10 and 40. Only poly-A  
1146 showed reduced competition for RADA binding.

1147

1148 **Supplemental Figure 6.** Transmission electron microscope (TEM) images

1149 TEM images of cells from leaves of same size showed morphologically normal chloroplasts  
1150 (cp) in *radA*. Mitochondria (mt) were enlarged and less electron dense as compared to  
1151 mitochondria from WT cells.

1152

1153 **Supplemental Figure 7.** No apparent effect of RADA deficiency on cpDNA stability.

1154 Scanning of the cpDNA of *radA* mutants for changes in relative copy numbers of the different  
1155 cpDNA regions. Sequences spaced 5-10 kb apart on the cpDNA were quantified by qPCR,  
1156 as described for the mtDNA in Figure 6. Values are the mean  $\pm$  SD of three technical  
1157 replicates. Coordinates correspond to the ones of the published Col-0 cpDNA sequence. The  
1158 three major regions of the cpDNA are indicated: LSC, large single copy region; SSC, small  
1159 single-copy region; IR, inverted repeat.

1160

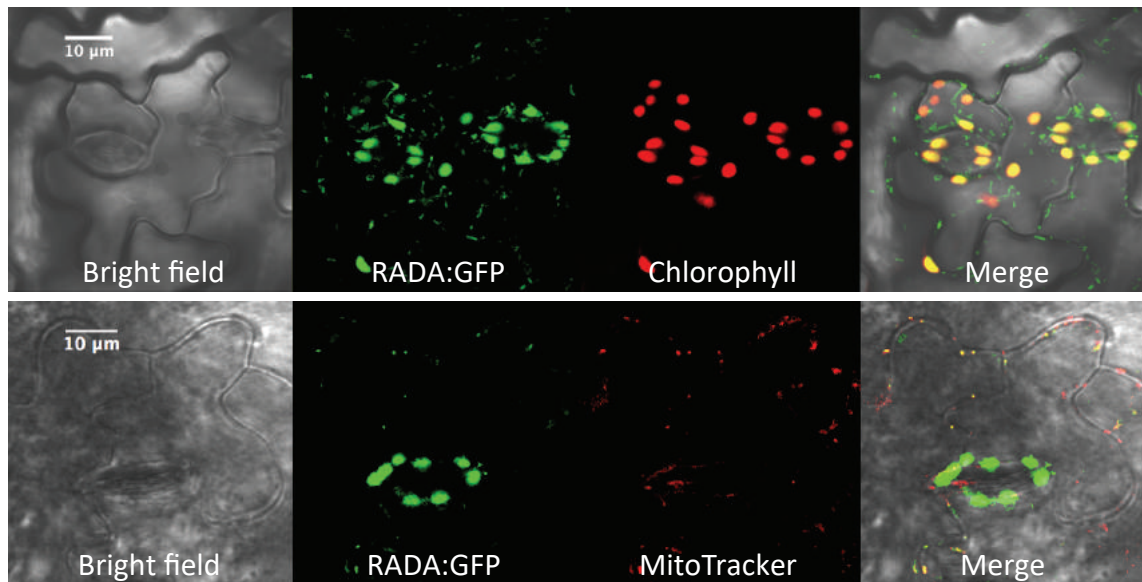

**Figure 1. Arabidopsis RADA is targeted to both chloroplasts and mitochondria.**

The RADA:GFP fusion protein was constitutively expressed in transgenic plants and its location observed in leaf epidermal cells. It co-localized with both chloroplasts (autofluorescence of chlorophyll) and mitochondria (red fluorescence of MitoTracker).

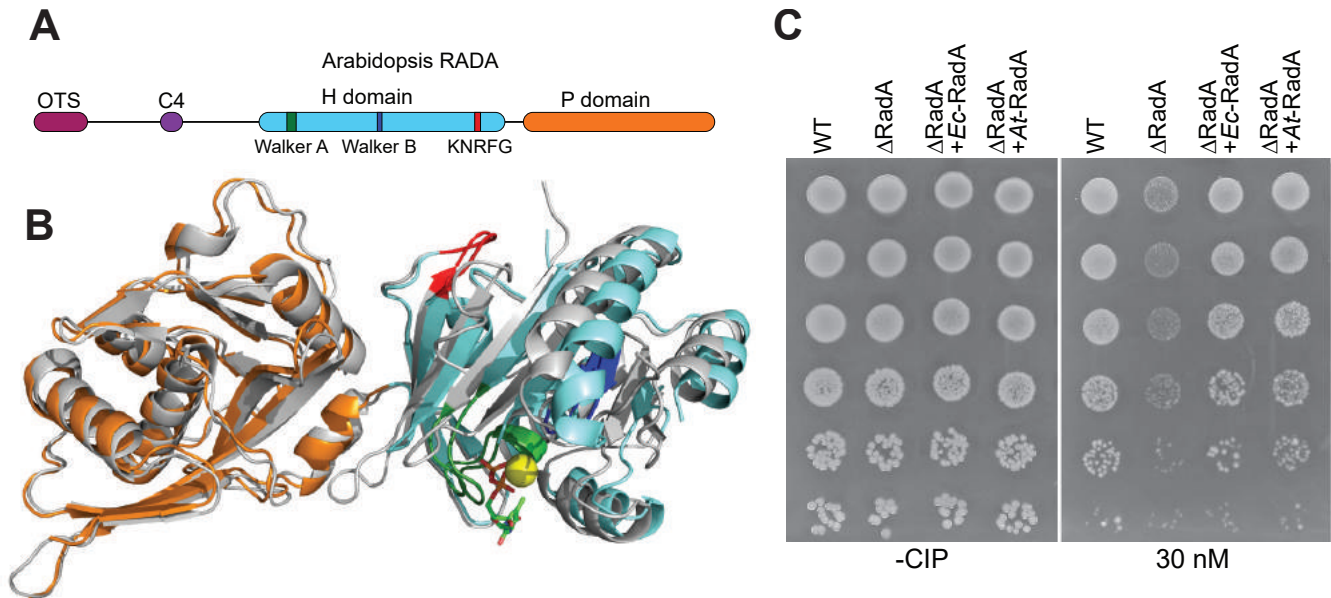

**Figure 2. The Arabidopsis RADA is structurally and functionally homologous to bacterial RadA.**

(A) The modular structure of plant RADA is similar to the one from bacteria, with a N-terminal zinc-finger (C4), an helicase and Lon-protease-like domains (H and P domains respectively). Plant precursor proteins have an N-terminal extension containing an organellar targeting sequence (OTS). (B) Model of Arabidopsis RADA superposed on the known structure of *S. pneumoniae* (in gray) (Marie et al., 2017). The color code of relevant domains is as in (A). Bound ADP and the  $Mg^{2+}$  ion (yellow ball) are shown. (C) Complementation of an *E. coli radA* mutant ( $\Delta$ RadA) for growth in the presence of genotoxic ciprofloxacin (CIP). Arabidopsis RADA (*At*-RADA) complements the mutation as efficiently as the bacterial one (*Ec*-RadA) cloned in the same expression vector.



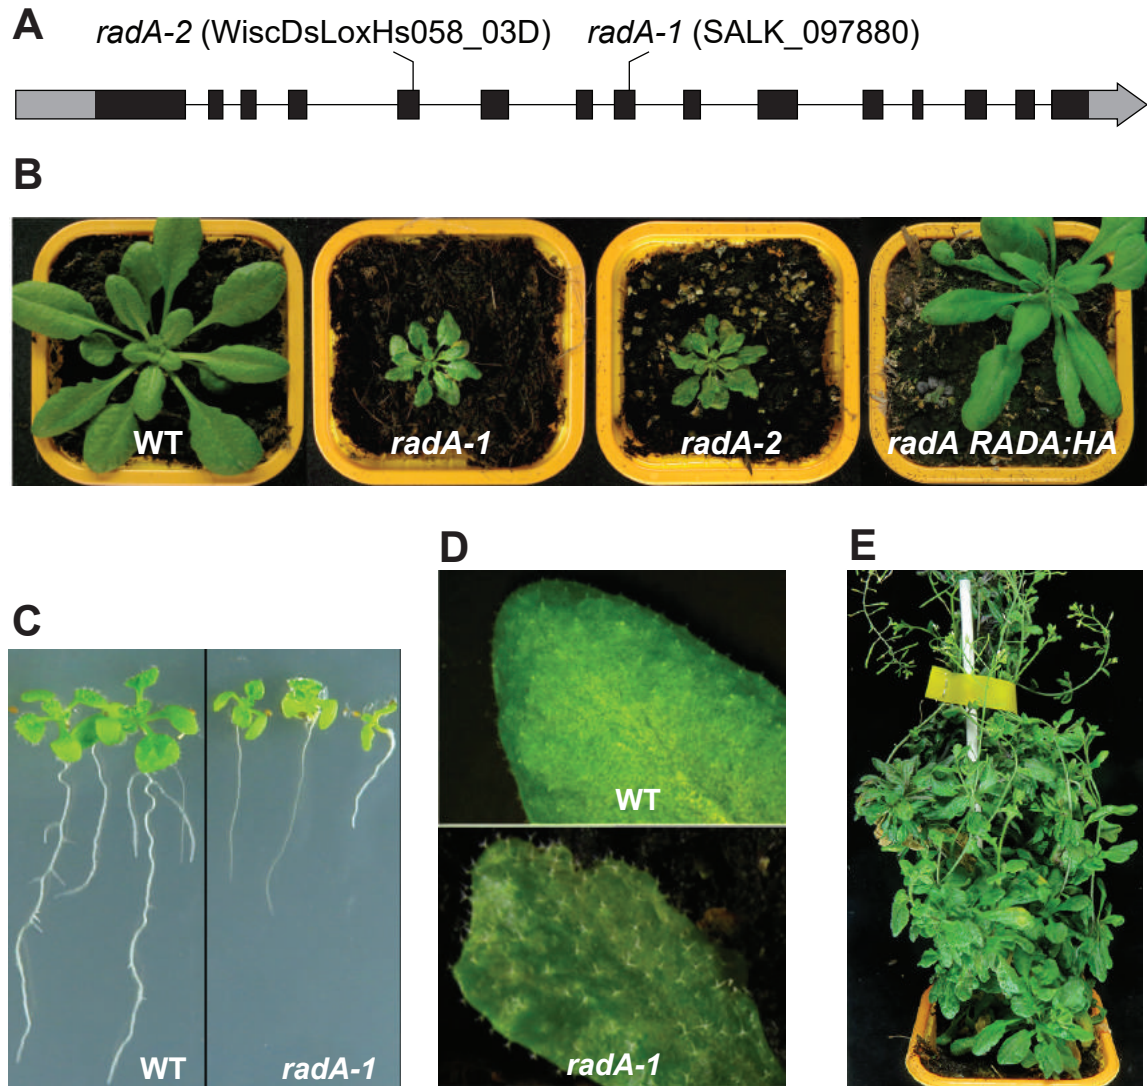

**Figure 4. Arabidopsis *radA* mutants and phenotypes.**

(A) Schematic representation of the Arabidopsis *RADA* gene. Coding sequences are in black and 5'- and 3'-UTRs are in gray. The position of the T-DNA insertions in *radA* mutant lines is shown. (B) *radA* plants show severe growth retardation, with distorted leaves presenting chlorotic sectors. These can be complemented by expression of HA-tagged *RADA* (*RADA:HA*) under control of the endogenous promoter. (C) root shortening of *radA* plants. (D) Detail of leaves phenotype. (E) Perennial vegetative growth of plants grown on short days (8h light), with development of aerial rosettes (4-month old *radA-1* plant).

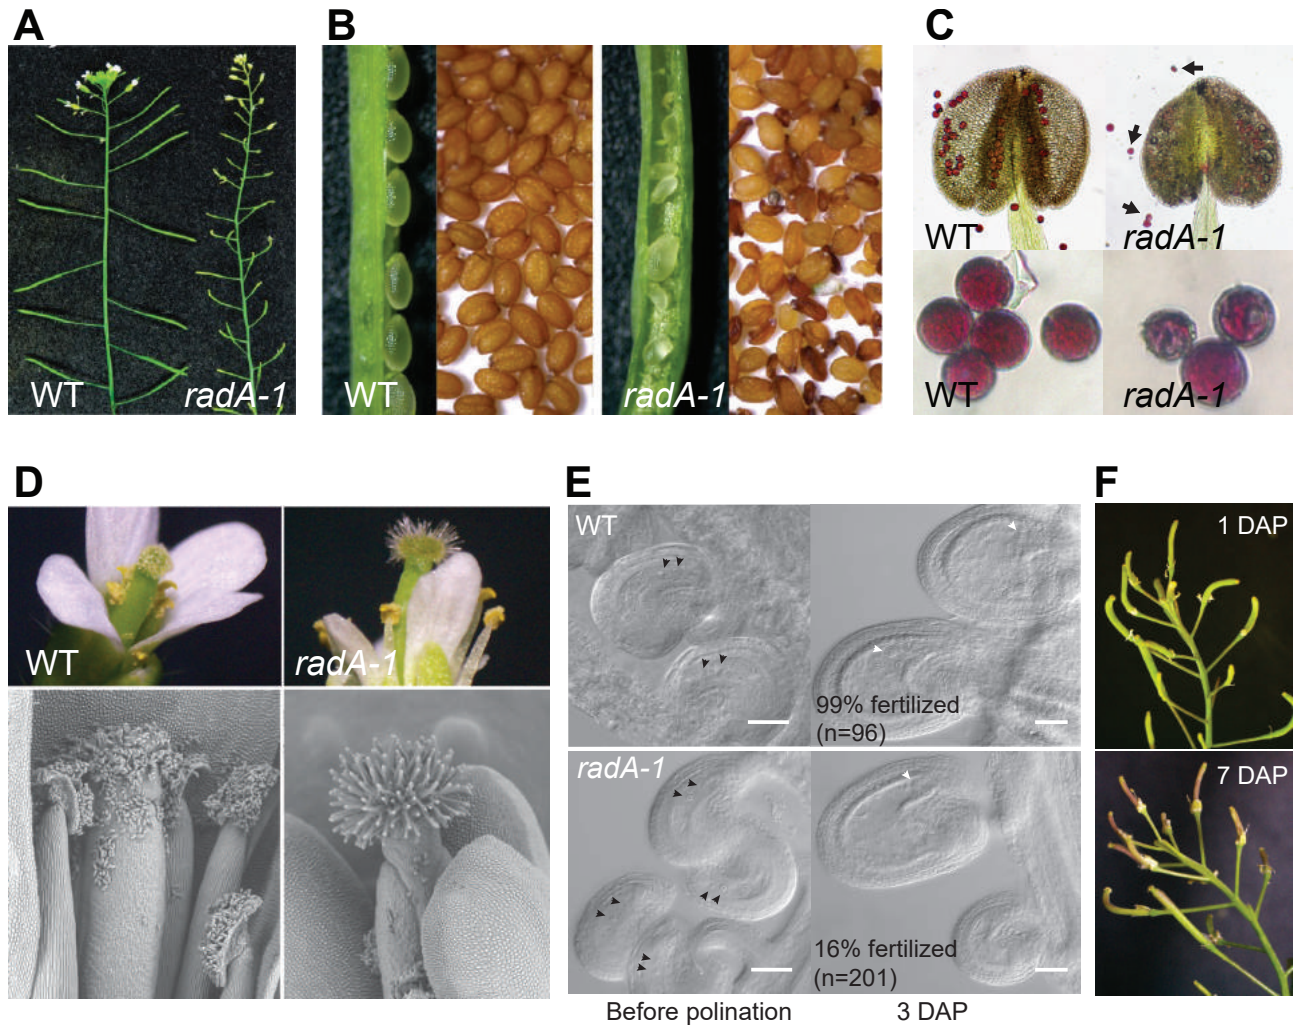

**Figure 5. Reduced fertility of *radA* plants.**

(A) Comparison of WT and *radA* flower stems showing very small *radA* siliques. (B) *radA* siliques have mostly aborted seeds, and the few seeds produced are mostly non-viable. (C) Alexander staining of pollen in *radA* anthers as compared to WT, showing little pollen production, and an abundance of small and aberrant pollen grains (indicated by arrows). (D) Visible and SEM Images showing that no pollen binds to the papillae in *radA* stigma. (E) Differential interference contrast images of ovules on crosses between *radA-1* flowers and WT pollen. Black arrowheads indicate central cell and egg cell nuclei in unfertilized ovules. White arrowheads indicate developing embryos in fertilized ovules, three days after pollination (DAP). Only 16 % of *radA* ovules could be fertilized. Scale bar is 50  $\mu$ m. (F) After seven DAP the pollinated pistils of *radA* did not develop further.

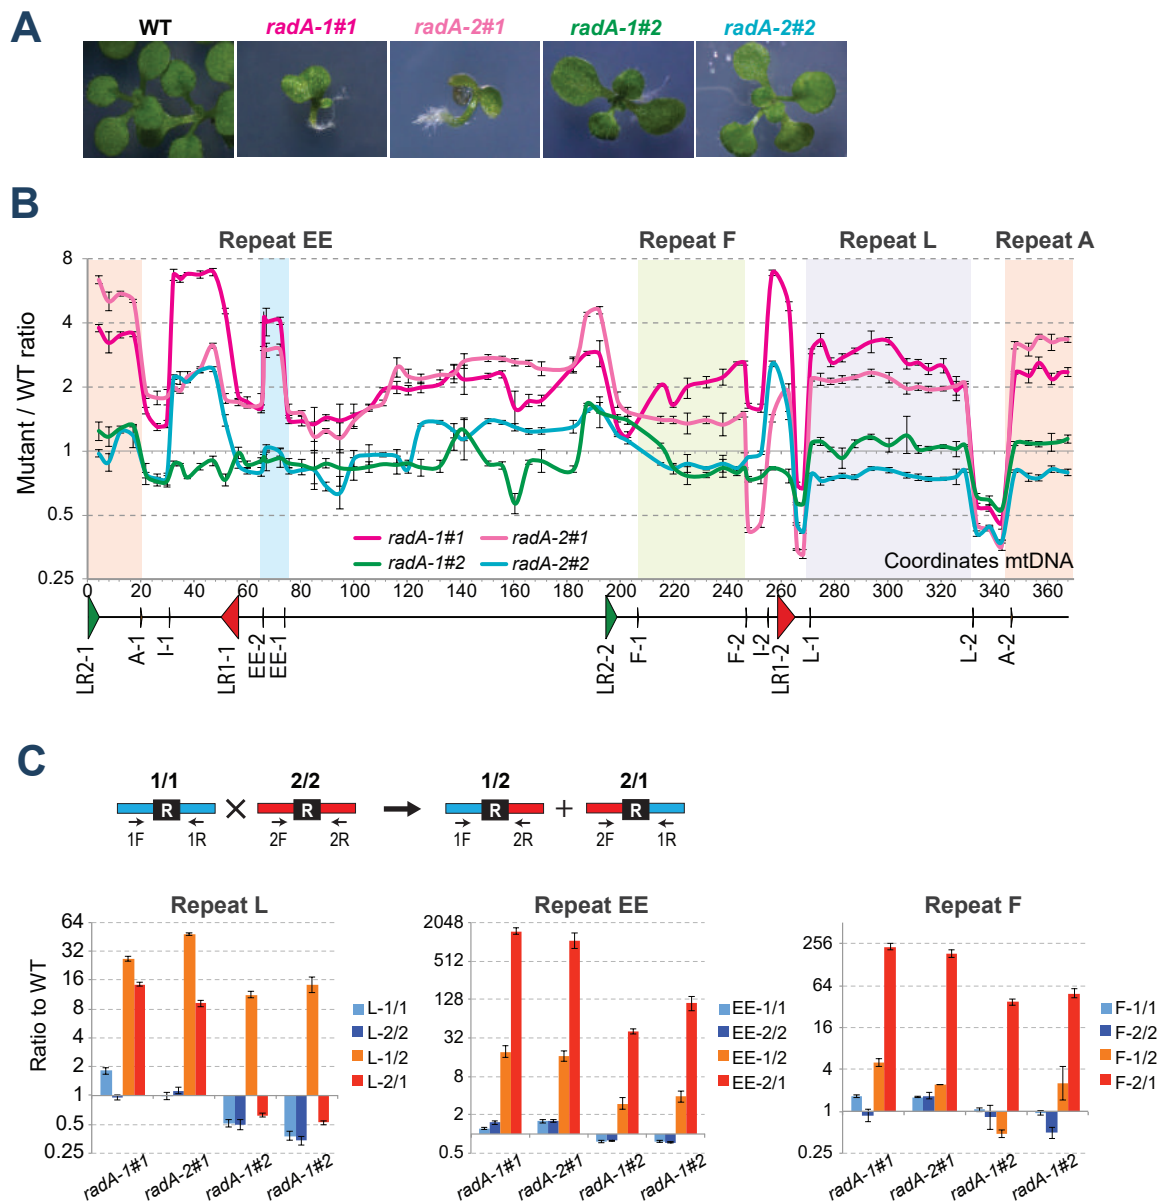

**Figure 6. Changes in mtDNA sequences stoichiometry in *radA* mutants because of increased ectopic recombination across repeats.**

(A) Picture of severely affected (*radA-1#1* and *radA-2#1*) and mildly affected (*radA-1#2* and *radA-2#2*) seedlings that were analyzed. (B) Scanning of their mtDNA for changes in relative copy numbers of the different mtDNA regions. Sequences spaced 5-10 kb apart on the mtDNA were quantified by qPCR. Coordinates are those of the Col-0 mtDNA sequence. The position of the mtDNA large repeats LR1 and LR2 and of relevant intermediate size repeats are shown below the graphic. Regions with changed stoichiometries flanked by repeat pairs are shadowed. Error bars are the *SD* values from three technical replicates. (C) Accumulation of crossover products from mtDNA repeats L, F and EE in the *radA* seedlings relative to WT. Results are in a log<sub>2</sub> scale. The scheme shows the qPCR relative quantification of parental sequences 1/1 and 2/2 and of the corresponding crossover products 1/2 and 2/1. Results are the mean of three technical replicates, and error bars correspond to *SD* values.



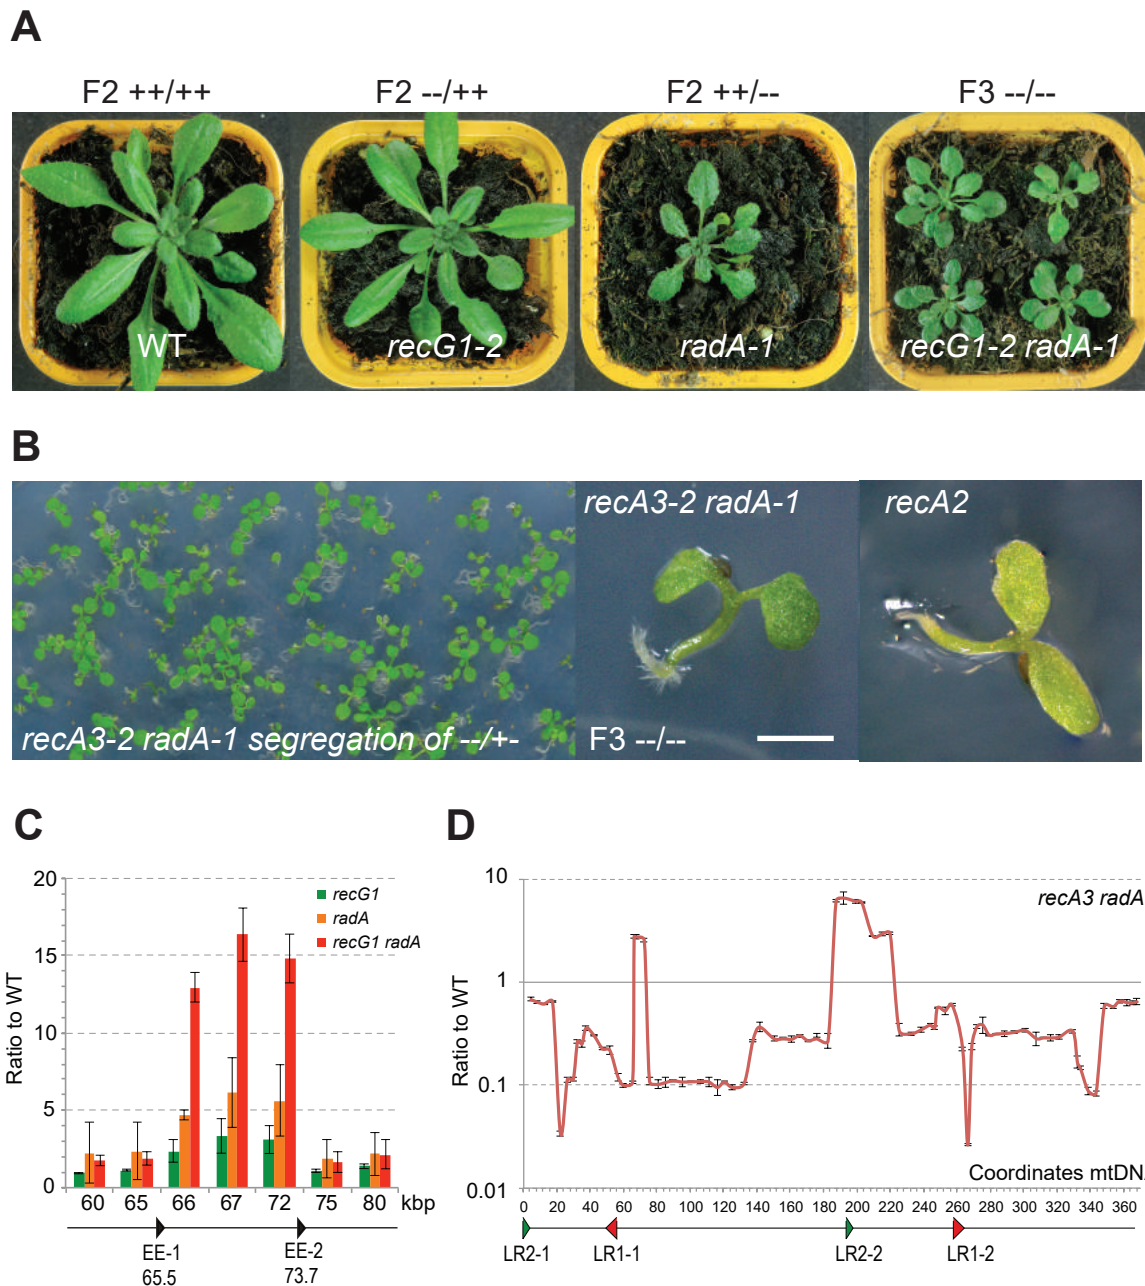

**Figure 7. Synergistic effects of the *radA* mutation on *recG1* and *recA3*.**

(A) Crosses of *recG1-2* and *radA-1* (pollen donor) show that double homozygote *recG1 radA* plants are as affected as simple homozygote *radA* plants. (B) Crosses and segregation of *recA3-2* and *radA-1* (pollen donor) show that double homozygote *recA3 radA* seedlings do not grow roots and do not grow further. The phenotype is similar to the one observed for *recA2* mutants (Miller-Messmer et al. 2012). The scale bar is 1 mm. (C) qPCR analysis of the copy number of mtDNA sequences around and within the region comprised between pair of repeats EE, previously shown to generate an episome by recombination in *recG1* plants (Wallet et al. 2015). Autonomous replication of the episome is significantly increased in the *recG1 radA* double mutant. Results show the mean and SD error bars from 2 or 3 (for *recG1 radA*) biological replicates. (D) Scanning of the copy numbers of the different mtDNA regions in *recA3 radA*, as described in Figure 6, showing severe reduction of several mtDNA regions. Results were compared to those of WT seedling of same size, and are in log scale.

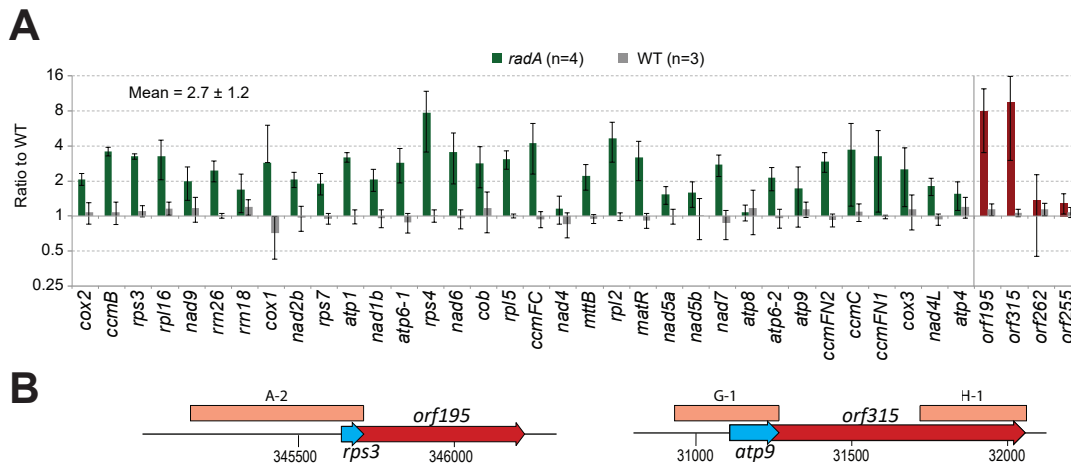

**Figure 8. Accumulation of mitochondrial transcripts in *radA*.**

(A) Representative mitochondrial transcripts were quantified by RT-qPCR, from the RNA of 10-day old seedlings grown *in vitro*, and normalized against a set of nuclear housekeeping genes. The quantification of several transcripts of orfs whose transcription could be potentially affected by ectopic recombination involving IRs are shown on the right, in red. Results are on a log<sub>2</sub> scale and are the mean from four biological replicates (two pools of *radA-1* and two pools of *rad-2* seedlings) and corresponding SD error bars. (B) Chimeric *orf195* and *orf315* created by recombination whose transcription is augmented in *radA* plants. The regions corresponding to *rps3* and *atp9* sequences are shown in blue. Repeated sequences are represented by orange bars. Coordinates on the mtDNA are indicated.

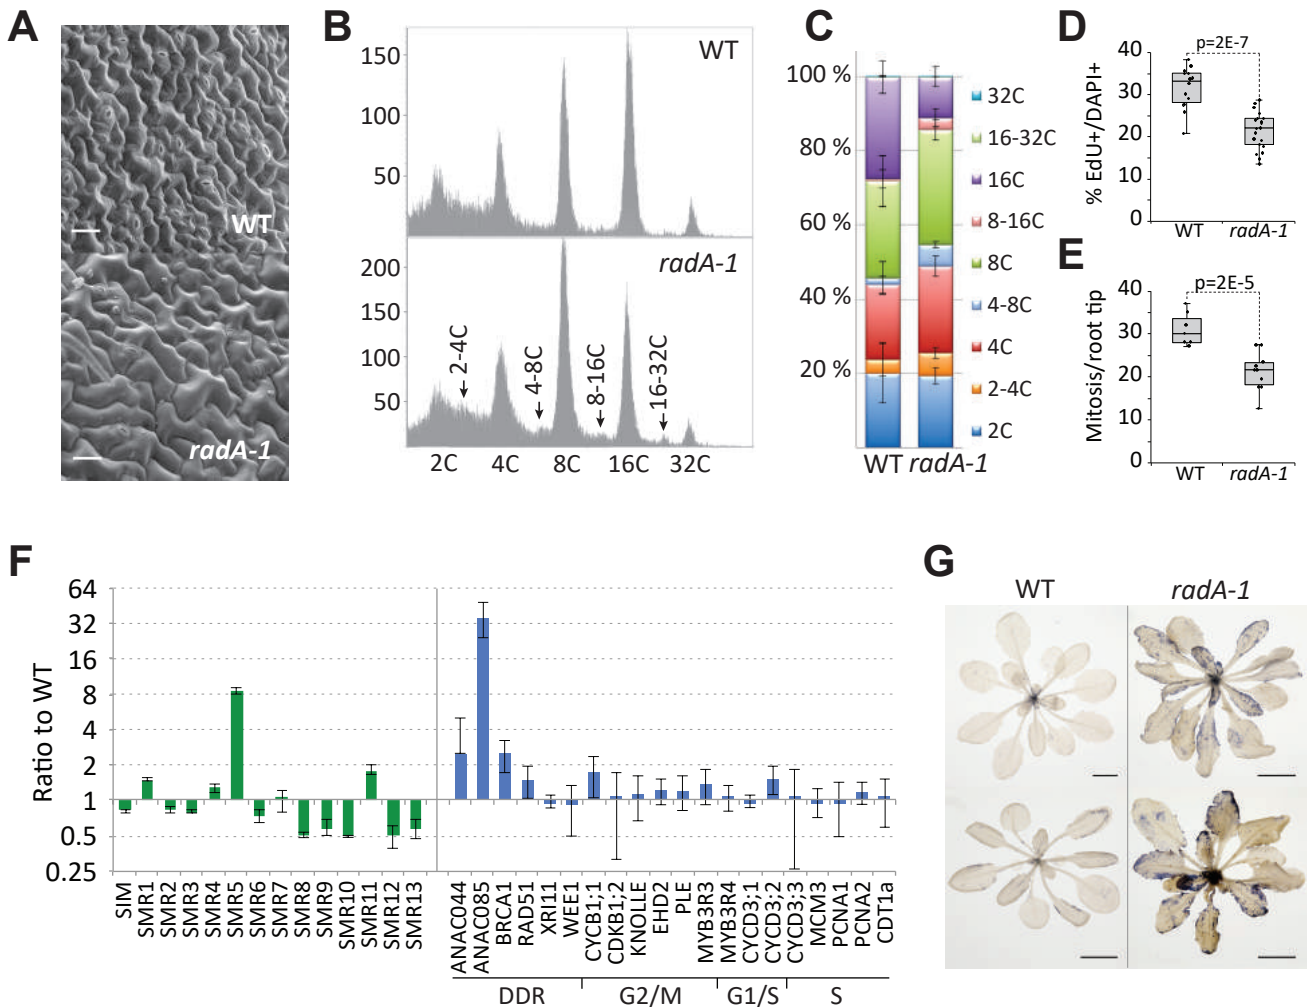

### Figure 9. Cell cycle progression is impaired in *radA* plants.

(A) Scanning electron microscopy images showing that in *radA* leaves epidermal cells are much larger and there are fewer stomata, half the number for the same leaf surface. Scale bar is 20  $\mu\text{m}$ . (B) Flow-cytometry profile obtained in WT (Col-0) and *radA*. The DNA content of nuclei extracted from the first true leaves of 20 day-old plants was analyzed. (C) Ploidy distribution, showing decreased endoreduplication in the mutant, with an increased proportion of 4C and 8C nuclei and a decreased proportion of 16C nuclei. Values are the average  $\pm$  SD of 4 experiments for WT and six experiments for *radA* ( $n > 20\,000$  nuclei). (D) Decreased DNA synthesis in the nuclei of *radA* root tip cells, as evaluated by the ratio between EdU positive and DAPI (4',6'-diamidino-2-phénylindol) positive cells. (E) Decreased number of cells undergoing mitosis. Significances were calculated by Student's t test. (F) RT-qPCR analysis of the expression of a set of cell cycle related genes in 10-day old WT and *radA* seedlings, revealing activation of *SMR5* and *ANAC085*. Data is represented in a log<sub>2</sub> scale and is the mean  $\pm$  SE of three biological replicates (two pools of seedlings from *radA-1* and one from *radA-2*). (G) NBT (nitro blue tetrazolium) staining for O<sup>2-</sup> of plants of equivalent size grown under same conditions, showing that *radA* mutants accumulate much more ROS than WT plants. Scale bar is 1 cm.
